# Canonical Wnt Signaling Maintains Human Mesenchymal Progenitor Cell Multipotency During Adipose Tissue Development

Zinger Yang Loureiro<sup>1</sup>, Shannon Joyce<sup>1</sup>, Javier Solivan-Rivera<sup>1</sup>, Anand Desai<sup>3</sup>, Pantos Skritakis<sup>3</sup>,  
Qin Yang<sup>1</sup>, Tiffany DeSouza<sup>3</sup>, Tammy Nguyen<sup>2</sup>, Ormond A MacDougald<sup>4,5</sup>, Silvia Corvera<sup>3,6,7</sup>

<sup>1</sup>Morningside Graduate School of Biomedical Sciences, University of Massachusetts Chan Medical School, Worcester, MA, USA

<sup>2</sup>Division of Vascular Surgery, Department of Surgery, UMass Memorial Medical Center, Worcester, MA, USA

<sup>3</sup>Program in Molecular Medicine, University of Massachusetts Chan Medical School, Worcester, MA, USA

<sup>4</sup>Department of Molecular and Integrative Physiology, University of Michigan Medical School, Ann Arbor, MI, USA

<sup>5</sup>Division of Metabolism, Endocrinology, and Diabetes, Department of Internal Medicine, University of Michigan Medical School, Ann Arbor, MI, USA

<sup>6</sup>Diabetes Center of Excellence, University of Massachusetts Chan Medical School, Worcester, MA, USA

<sup>7</sup>Corresponding author at: [Silvia.Corvera@umassmed.edu](mailto:Silvia.Corvera@umassmed.edu)

Program in Molecular Medicine  
373 Plantation Street,  
Worcester, MA 01605,  
USA

1 **ABSTRACT**

2 Tissue development and repair throughout life depends on the availability of multipotent  
3 mesenchymal stem/progenitor cells capable of differentiating into specialized cell types. How an  
4 appropriately sized pool of such multipotent progenitors is maintained under varied signals for  
5 tissue growth and repair is unknown. We addressed this question by monitoring fate trajectories  
6 of human adipose tissue-derived multipotent progenitor cells using single-cell transcriptomics.  
7 Homogenous multipotent progenitors underwent two distinct fate trajectories rapidly upon  
8 induction of adipose differentiation– one toward the adipocyte fate, and the other towards a  
9 distinct, non-differentiated state characterized by up-regulation of canonical Wnt target genes.  
10 Upon isolation, this latter cell population was able to resume proliferation and display multipotency.  
11 Using canonical Wnt agonists and antagonists we find Wnt signaling is required for the  
12 maintenance of this multipotent pool under differentiation stimulus. *In vivo*, these cells are retained  
13 in adipose tissue developed from human multipotent progenitor cells in immunocompromised  
14 mice, and their transcriptomic signature is detected in human adult adipose tissue. Our study  
15 reveals a previously unrecognized mechanism for maintaining a functional pool of human  
16 mesenchymal progenitor cells under conditions of differentiation pressure, driven by Wnt signaling.  
17

18 Key words: mesenchymal progenitors, adipose tissue, adipocyte, Wnt, MGP, ADIPOQ, DPP4,  
19 osteogenesis, chondrogenesis, adipogenesis, ADSC.

20

21 **INTRODUCTION**

22 Adult somatic tissues contain specialized cells whose specific properties define organ- and tissue-  
23 specific functions. Replacement of these specialized cells when damaged or dead is essential for  
24 continuous tissue and organ function throughout the lifetime, and depends on the availability of  
25 multipotent stem/progenitor cells capable of differentiating into characteristic cell types. The  
26 properties of progenitor cells in epithelial tissues, such as the skin and intestine, and in blood

27 have been well characterized <sup>1-3</sup>, but how mesenchymal progenitor cells involved in the  
28 development of bone, cartilage, and adipose tissues are maintained is less clear. These  
29 mechanisms are particularly intriguing because a large proportion of these cells reside in adipose  
30 tissue <sup>4,5</sup>, which is uniquely capable of massive expansion in adults <sup>6,7</sup>. Indeed, in severe obesity,  
31 over 50% of body mass can be comprised of adipose tissue <sup>8</sup>. How an adequate pool of  
32 multipotent mesenchymal progenitors is maintained under conditions of chronic differentiation  
33 pressure into the adipocyte fate is not known.

34

35 Foundational insights into mechanisms underlying adipocyte differentiation have been obtained  
36 primarily in mouse models <sup>9</sup>. Two stages of murine adipocyte formation have been defined– the  
37 determination phase and the terminal differentiation phase. In the determination phase,  
38 multipotent mesenchymal progenitor cells give rise to pre-adipocytes, which remain  
39 morphologically indistinguishable from progenitors but lose the ability to differentiate into other  
40 cell types. In the terminal differentiation phase, pre-adipocytes express genes for lipid transport  
41 and synthesis, form large and specialized lipid droplets, and secrete adipocyte specific cytokines  
42 such as adiponectin. Terminal differentiation is transcriptionally controlled through sequential  
43 expression of members of the *CCAAT/enhancer binding protein (C/EBP)*, *peroxisome proliferator-*  
44 *activated receptor (PPAR)* families, and the *adipocyte determination and differentiation factor-*  
45 *1/sterol response element binding protein 1c (ADD1/SREBP1c)*, and can be inhibited *in vitro* by  
46 enforced expression of *Wnt10b*, which signals through the canonical Wnt pathway and blocks  
47 expression of *peroxisome proliferator-activated receptor-γ (PPARγ)* and *CCAAT/enhancer*  
48 *binding protein-α (C/EBPA)* <sup>10-12</sup>,

49 Much less is known about the process of determination of multipotent mesenchymal progenitors  
50 into pre-adipocytes, largely due to the lack of suitable cell models. However, an important role for  
51 Wnt signaling is supported by the finding that *Wnt10b*-null mice display a progressive loss of  
52 adipogenic and osteogenic progenitors and premature adipogenesis/osteogenesis <sup>13</sup>. Moreover,

53 there is a genetic associations between mutations in *TCF7L2* and *WNT5B* and the development  
54 of type 2 diabetes <sup>14-16</sup> and between variants of *WNT10B* and the development of obesity <sup>17</sup>.

55

56 Previous work has shown that mesenchymal progenitor cells in adipose tissue reside in close  
57 association with the microvasculature <sup>18-23</sup>, and we have previously found that culture conditions  
58 that promote angiogenesis also promote the proliferation of mesenchymal progenitor cells <sup>24,25</sup>  
59 which give rise to multiple human adipocyte subtypes <sup>26</sup>. In this study, we sought to leverage  
60 these cells to investigate the mechanisms that govern determination of mesenchymal prgenitors  
61 and their differentiation into diverse human adipocyte subtypes. Using single cell transcriptomics,  
62 we find that upon adipogenic stimulation, human multipotent mesenchymal progenitor cells  
63 differentiate into adipocytes, but there is a simultaneous induction of a pool of cells that do not  
64 differentiate. Upon isolation, these cells regain proliferative capacity and the ability to differentiate  
65 into multiple lineages, including chondro- and osteo-genic lineages. This multipotent reservoir is  
66 characterized by expression of Wnt target genes, and its size is controlled by canonical Wnt  
67 signaling. These results reveal a mechanism, elicited under conditions of strong differentiation  
68 pressure, that maintains a pool of functional multipotent mesenchymal progenitors, and explains  
69 how human mesenchymal tissues can be maintained and repaired throughout the lifetime.

## 70 **RESULTS**

### 71 **Acute transcriptional remodeling of multipotent progenitor cells in response to adipogenic** 72 **stimulation**

73 Small fragments of human subcutaneous adipose tissue from subjects undergoing elective  
74 panniculectomy surgery were harvested within six hours of surgery and embedded in Matrigel.  
75 After 14 days in culture, extensive growth of capillary sprouts was observed (Fig. 1a, top panel).  
76 Sprouts were digested using Dispase and Collagenase Type I and plated in plastic culture dishes,  
77 where they adopted a fibroblastic homogenous phenotype characteristic of mesenchymal  
78 progenitor cells (Fig. 1a, right panel). After two passages, cells were frozen for further studies. To



79 determine whether cells obtained by this method retain multipotency, monolayers were exposed  
80 to adipose, chondro- or osteo- genic differentiation media for 10 day and stained or subjected to  
81 bulk RNA sequencing. Staining for neutral lipid, proteoglycan or calcium was seen only in cells  
82 exposed to specific differentiation cocktails (Fig. 1b). Evidence for multipotent differentiation was  
83 also seen in gene expression profiles, where selected genes associated with the adipogenic  
84 (*ADIPOQ*, *PLIN1*), chondrogenic (*ACAN*, *COL10A1*) or osteogenic (*ALPL*, *SMOC2*) lineages  
85 were selectively expressed in response to each cocktail (Fig. 1c). These results confirm that  
86 mesenchymal progenitor cells derived by this method are multipotent. Notably, not all cells  
87 underwent differentiation, as cells lacking lipid droplets could be detected alongside lipid replete  
88 cells (Fig. 1b, top panel).

89  
90 To further understand mechanisms governing adipogenic fate commitment, we performed bulk  
91 RNA-seq to analyze the transcriptomes of progenitors derived from two independent donors at 0,  
92 3, 7 and 14 days post adipogenic induction (Fig. 1d). Principal component analysis (PCA) (Fig.  
93 1f) reveals the largest variance to be associated with differentiation and little variance attributable  
94 to the tissue donor. The largest gene expression changes occur between 0 and 3 days of  
95 exposure to adipogenic induction, when the cells have not yet accumulated large lipid droplets  
96 (Fig. 1e). Consistently, the number of differentially expressed genes between 0 and 3 days of  
97 differentiation (3268 genes) is higher than that seen between 3 and 7 days (1908 genes), or  
98 between 7 and 14 days (413 genes) (Fig. 1g). Expression of adiponectin (*ADIPOQ*), an adipocyte  
99 specific cytokine, is maximal at 3 days after induction (Fig. 1h), indicating that commitment to the  
100 adipogenic fate occurs early. Additional adipocyte development continues beyond 3 days, as  
101 evidenced by delayed expression of leptin (*LEP*), another adipocyte-associated cytokine (Fig. 1h).  
102 Concomitantly with induction of adipocyte genes, mesenchymal progenitor cell markers  
103 *THY1/CD90*, *ENG/CD105*, *NT5E/CD73* were detected at all time points, and *THY1* and *ENG*  
104 expression increased over time (Fig. 1i). The detection of mesenchymal progenitor and

105 differentiated adipocyte markers is consistent with a heterogenous cell population during the  
106 differentiation process.

107

### 108 **Single-cell RNA-seq reveals adipogenic induction elicits two distinct fates trajectories**

109 To understand the specific transcriptomic changes in cells undergoing adipogenic differentiation  
110 without confounding signals from cells that do not undergo differentiation, we performed single  
111 cell RNA-seq on two separate cultures: one corresponding to multipotent progenitors grown to  
112 confluency but not subjected to differentiation stimuli, and the second corresponding to  
113 progenitors exposed to adipogenic media for 3 days (Fig. 2a, Extended Data Fig. 1). At this time  
114 point, cells displayed minimal lipid accumulation and were thereby still amenable to the  
115 microfluidic-based single cell profiling. Projection of cells from these two culture conditions by the  
116 top two principal components showed the two populations were non-overlapping (Fig. 2b),  
117 indicating that all cells undergo extensive transcriptomic changes upon adipogenic induction.  
118 Interestingly, a broader transcriptomic spectrum is seen in cells subjected to adipogenic induction,  
119 as evidenced by the larger spread in the principal component projection.

120

121 To gain insight on the nature of the transcriptomic variance, we performed developmental  
122 trajectory inference using RNA velocity. This analysis indicates that upon induction, progenitors  
123 diverge along distinct trajectories toward two cell fates (Fig. 2c): Cells in the terminal of one  
124 trajectory expressed adipocyte-specific genes including *adiponectin* (*ADIPOQ*), *perilipin* (*PLIN1*),  
125 and *lipoprotein lipase* (*LPL*), while cells at the terminal of the opposite trajectory expressed  
126 extracellular matrix genes (*MGP/matrix gla protein*, *DCN/decorin*, *CTHRC1/collagen triple helix*  
127 *repeat containing 1*) (Fig. 2d-g). Importantly, these cells also retained mesenchymal progenitor  
128 marker expression (*THY1*, *NT5E*, *ENG*) (Fig. 2h,i). The observation of two fates upon adipogenic  
129 induction was consistent with morphological observations that, upon adipogenic induction, a  
130 fraction of cells routinely failed to accumulate lipid droplet (Fig. 1b). To evaluate whether the

131 markers identified were specific to adipocyte differentiation or preserved across different lineages,  
132 we profiled the transcriptome of progenitors induced toward adipogenic, chondrogenic, or  
133 osteogenic lineages for 3 days (Extended Data Fig. 2a-d, 3c-d).

134  
135 Adipocyte-specific genes *ADIPOQ*, *PLIN1*, *LPL* were consistently detected in the adipogenic  
136 induced cells in all profiled datasets (Extended Data Fig. 3a,c), but *CTHRC1* and *DCN*, identified  
137 in cells of the other trajectory, were detectable in non-induced cells in other profiled datasets  
138 (Extended Data Fig. 3b,d), suggesting that these genes may not be representative fate markers.  
139 We selected *MGP* as a representative marker for the induced, non-adipogenic population, as  
140 *MGP* expression was not detected in uninduced progenitors and was consistently upregulated in  
141 adipogenic induction cells from all donors analyzed (Extended Data Fig. 3b,d). Intriguingly, in the  
142 transcriptomic profile of progenitor cells stimulated with adipogenic/chondrogenic/osteogenic  
143 induction or basal media for three days, *MGP* was upregulated in all induced conditions (Extended  
144 Data Fig. 3d), suggesting the *MGP*<sup>+</sup> cells may represent a generic population that is intentionally  
145 preserved.

#### 146 147 ***MGP*<sup>+</sup> cells express Wnt target genes, retain proliferative potential and multipotency**

148 To further investigate the identity of the *MGP*<sup>+</sup> cells, we conducted differential gene expression  
149 analysis comparing the *MGP*<sup>+</sup> and *ADIPOQ*<sup>+</sup> cells (Fig. 3a). As expected, *ADIPOQ*<sup>+</sup> cells were  
150 enriched in genes associated with adipocyte-related pathways (Fig. 3b). In contrast, *MGP*<sup>+</sup> cells  
151 were enriched in genes associated with skeletal development pathways, mostly comprising  
152 extracellular matrix proteins (Fig. 3c). However, these cells did not express osteocyte  
153 (*osteocalcin/BGLAP*, *osteopontin/SPP1*) or chondrocyte (*aggrecan/ACAN*, *cartilage*  
154 *collagen/COL2A1*) markers, suggesting that the *MGP*<sup>+</sup> cells were not comprised of cells  
155 undergoing differentiation into an alternative mesenchymal cell lineage. Further analysis of the  
156 *MGP*<sup>+</sup> population revealed that multiple canonical Wnt target genes (*SFRP2*, *DPP4*, *DKK1*, *SNAI2*,

157 *WISP2*) were significantly up-regulated (Fig. 3d,e). Components of canonical Wnt signaling  
158 including Wnt ligands *WNT5A*, *WNT5B* and core pathway members  $\beta$ -*catenin/CTNNB1*, *TCF7L2*  
159 were expressed (Fig. 3f), suggesting the cells were capable of Wnt activities. The RNA-seq results  
160 of primary mouse mesenchymal progenitors with  $\beta$ -*Catenin* knockout or *Wnt3a* treatment from a  
161 study previously published<sup>10</sup> revealed *Mgp* level decreased in  $\beta$ -*Catenin* knockout cells  
162 comparing to the control and *Mgp* level increased after *Wnt3a* treatment in both tested timepoint  
163 (Fig.3g), implying *MGP* is a downstream gene of canonical Wnt signaling. Among the Wnt target  
164 genes, *DPP4* was reportedly a marker for undifferentiated adipocyte progenitor<sup>27</sup>. Treatment of  
165 progenitors with *DPP4*-specific inhibitors LAF237 or MK0431 during adipogenic induction do not  
166 increase adipocyte lipid droplet number or sizes (Extended Data Fig. 4), indicating *DPP4* did not  
167 have a functional role in progenitor maintenance. Moreover, ligand-receptor analysis of potential  
168 interactions between *ADIPOQ*<sup>+</sup> and *MGP*<sup>+</sup> cells revealed Wnt-induced *Ephrin B1 (EFNB1)* in  
169 *ADIPOQ*<sup>+</sup> cells and *Ephrin type-B receptor 6 (EPHB6)* in the *MGP*<sup>+</sup> cells (Fig. 3h,i). Other  
170 significant interactions between *ADIPOQ*<sup>+</sup> and *MGP*<sup>+</sup> cells included of collagens, integrins and  
171 other structural extracellular proteins interacting with cognate receptors (Supplemental Table 1).  
172 These results indicate that *MGP*<sup>+</sup> cells comprise a unique population of cells with no clear  
173 mesenchymal lineage fate commitment, and they were responsive to Wnt signal.

174

175 To further investigate the functional characteristics of the *MGP*<sup>+</sup> cells, we first tested whether they  
176 represent the cells that fail to accumulate lipid droplets after exposure to adipogenic induction  
177 signal. The presence of lipid droplets decreases cell density, and 7-day adipogenic induced cells  
178 could be separated by centrifugation through Percoll gradients (Fig. 4a). Cells from cultures that  
179 were not exposed to differentiation induction were recovered between 1.02-1.04 g/ml densities  
180 (referred to as high-density cells), while cells differentiated for 7 days were recovered in two  
181 populations, one at the 1.01-1.02 g/ml (low-density cells) and another between 1.02-1.04 g/ml  
182 densities (high-density cells). The induced cells in the low-density population contained visible

183 lipid droplets, while the majority cells in the high-density population did not (Fig. 4a). To determine  
184 whether cells in the high-density population represented *MGP*<sup>+</sup> cells, we conducted bulk RNA-  
185 Seq of the high- and low-density induced cells and reviewed the expression of *ADIPOQ*<sup>+</sup> and  
186 *MGP*<sup>+</sup> cell markers, as determined by the single-cell RNA-Seq. We found that *ADIPOQ*<sup>+</sup> cells  
187 were highly enriched in the low-density cells, while *MGP*<sup>+</sup> cells were enriched in the high-density  
188 population (Fig. 4b). qRT-PCR confirmed a strong enrichment of *ADIPOQ* and *MGP* in induced,  
189 low- and high- density cells, respectively (Fig. 4c).

190

191 The ability to enrich for *MGP*<sup>+</sup> cells by density centrifugation allowed us to analyze their functional  
192 properties. We first queried whether these progenitor cells were inherently unable to undergo  
193 adipogenic differentiation. We grew multipotent progenitors to confluence and left one group  
194 untreated (referred to as “non-induced”) and subjected a second group to adipogenic  
195 differentiation for 7 days (referred to as “induced”). Cells were then lifted and subjected to percoll  
196 density separation. The high-density cells recovered from both the non-induced and induced  
197 populations were then seeded at high seeding density, such that confluency was achieved upon  
198 adherence (Fig. 4d). 48 hours post cell seeding, the high-density cells were subjected to additional  
199 adipogenic differentiation for 7 days. Oil red O staining and lipid droplet quantification revealed  
200 lipid droplet accumulation (Fig. 4e,f) and *ADIPOQ* was secreted (Fig. 4g) in the high-density cells  
201 recovered from either the non-induced or the induced cultures. The results revealed that *MGP*<sup>+</sup>,  
202 lipid-devoid cells generated upon adipogenic stimulation were responsive to adipogenic stimulus,  
203 as they were able to undergo adipogenesis upon a second round of induction.

204

205 The results above suggested that *MGP*<sup>+</sup> cells might represent a reservoir of multipotent  
206 progenitors generated in response to adipogenic pressure. To test this hypothesis, we analyzed  
207 whether *MGP*<sup>+</sup> cells retain proliferative capacity and multipotency. High density cells recovered  
208 after 7 days of adipogenic induction were plated at low seeding density in media used to expand

209 multipotent progenitors (Fig. 4h). Within 24 hours, cells began to proliferate and maintained the  
210 spindle-like fibroblastic morphology characteristic of progenitor cells (Fig 4i,j). Additional high-  
211 density cells were exposed to either adipogenic or osteogenic differentiation induction media and  
212 analyzed by qRT-PCR after 3 days and by staining after 14 days (Fig. 4h). Lineage markers for  
213 adipo-, chondro-, and osteo-genic fate, as defined by early multi-lineage transcriptome profiling  
214 (Extended Data Fig. 2e,f), were expressed with each respective differentiation induction (Fig. 4k).  
215 Lipid droplets and calcium aggregates were detected upon adipogenic or osteogenic  
216 differentiation, respectively (Fig. 4l,m). These results indicate that a specific pool of progenitor  
217 cells retain proliferative capacity and multipotency for a minimum of 7 days after induction of  
218 adipogenic differentiation.

219

#### 220 **The *MGP*<sup>+</sup> cells are maintained *in vivo***

221 We next sought to determine whether *MGP*<sup>+</sup> cells are present *in vivo* during human adipose tissue  
222 development. We leveraged a hybrid *in vivo* model, in which human mesenchymal progenitor  
223 cells were implanted into immuno-compromised mice after adipogenic induction (Fig. 5a,  
224 Extended Data Fig. 5). These cells generated a functional human/mouse hybrid adipose depot  
225 (Fig. 5b)<sup>28</sup>. Analysis of human transcript-specific reads in the implants 8 weeks after implantation  
226 revealed expected expression of human adipocyte genes (*ADIPOQ*, *PLIN1*, *LPL*), but also  
227 revealed expression of *MGP*<sup>+</sup> cluster markers (*MGP*, *CTHRC1*, *DCN*) (Fig. 5c,d), suggesting that  
228 a pool of multipotent progenitors was actively maintained in an *in vivo* environment. We then  
229 selected the top 40 differentially expressed genes between the *MGP*<sup>+</sup> and the *ADIPOQ*<sup>+</sup> single-  
230 cell populations to generate a signature for each cell type (Fig. 5e). To determine whether *MGP*<sup>+</sup>  
231 and the *ADIPOQ*<sup>+</sup> cell populations were present in human adult adipose tissue, we leveraged an  
232 atlas of single-cell and single-nuclei transcriptomes recently provided by Emont, et al.<sup>29</sup>. Emont  
233 et al identified multiple cell types comprising adult adipose tissue, including a population of  
234 stem/progenitor cells termed ASPCs. We found a clear signature of *MGP*<sup>+</sup> cells in ASPCs, and of

235 *ADIPOQ*<sup>+</sup> cells in mature adipocytes (Fig. 5f), indicating that *MGP*<sup>+</sup> cells were maintained  
236 throughout development and in adult human adipose tissue. *MGP* was expressed both in ASPCs  
237 of subcutaneous (SAT) and visceral adipose tissue (VAT), with SAT having overall higher level of  
238 *MGP*<sup>+</sup> cell marker genes (Extended Data Fig. 6a,b), consistent with SAT having higher  
239 expandability. Moreover, expression of Wnt target genes characteristic of *MGP*<sup>+</sup> cells was also  
240 seen in ASPCs and was negligible in mature adipocytes (Extended Data Fig. 6c). These results  
241 indicate that the signature of *MGP*<sup>+</sup> and *ADIPOQ*<sup>+</sup> cells is stable during adipose tissue  
242 development and maintenance. To further test this we analyzed the abundance of signature  
243 genes over 14 days of adipogenic differentiation *in vitro* (Fig. 5g). We find that these genes are  
244 stable over time and remain highly expressed in cells during *in vivo* adipose tissue development  
245 (Fig. 5h).

246

#### 247 **Wnt signaling controls homeostasis of *MGP*<sup>+</sup> and *ADIPOQ*<sup>+</sup> cell pools**

248 The expression of Wnt target genes in *MGP*<sup>+</sup> cells and ASPCs raises the possibility that Wnt  
249 signaling plays an active role in the maintenance of multipotent progenitor cells. To test this  
250 possibility, we examined the effects of canonical Wnt signaling during the early stages of  
251 adipogenic induction. We first analyzed the effects of the canonical Wnt agonist CHIR99021,  
252 which acts by inhibiting *GSK3* and preventing phosphorylation-triggered degradation of *β-Catenin*.  
253 In preliminary experiments, we found that chronic treatment of cells undergoing differentiation  
254 with CHIR99021 resulted in a decrease in ATP levels detectable at concentrations above 0.5 μM  
255 and increase in membrane permeability reflective of compromised cell viability (Fig. 6a, Extended  
256 Data Fig. 7). Accordingly, we used a low dose (0.4 μM) to examine the effects of Wnt activation  
257 in progenitor cells on the extent of subsequent adipogenic differentiation, assessed by measuring  
258 the number and size of lipid droplets at day 9 after induction (Fig. 6b) as well as expression of  
259 *ADIPOQ* at day 3 after induction. One day of exposure to CHIR99021, before addition of the  
260 adipogenic cocktail, resulted in a significant decrease in the number and size of lipid droplets at



261 day 9 (Fig. 6c,d). Expression of *ADIPOQ* was progressively suppressed with 2 and 3 days of  
262 exposure (Fig. 6e). To test whether suppression of canonical Wnt signaling would have the  
263 converse effect, we used the same paradigm to test the effects of XAV939, which stabilizes *AXIN*  
264 and promotes destruction of  $\beta$ -*Catenin*. An increase in lipid droplet number and size (Fig. 6g,h)  
265 and an increase in *ADIPOQ* levels (Fig. 6i) was seen in response to 1-2 days of exposure to the  
266 Wnt signaling inhibitor. Notably, CHIR990021 or XAV939 treatment resulted in *MGP* expression  
267 level changes in opposite direction to expression level changes of *ADIPOQ* (Fig 6f,j). These  
268 results suggest that activation of canonical Wnt signaling shifts the cell fate preference towards  
269 maintenance of an undifferentiated progenitor pool.

270

## 271 **DISCUSSION**

272

273 Multipotent mesenchymal progenitor cells are required throughout lifetime to renew and repair  
274 multiple tissues. However, how these progenitor cells are maintained under differentiation signals  
275 is not known. A striking finding in our study is that primary mesenchymal progenitors derived from  
276 human adipose tissue are highly homogenous at single-cell resolution. However, after only 3 days  
277 of adipogenic induction, clear heterogeneity develops and the cells diverge towards two  
278 trajectories; one toward the adipocyte phenotype, and another toward an undifferentiated state  
279 that maintains proliferative capacity and multipotency. These findings reveal that induction of  
280 adipogenic differentiation is coupled to a mechanism to preserve a reservoir of multipotent  
281 progenitor cells, allowing for tissue maintenance and development throughout the lifetime.

282

283 The discovery of this mechanism required a model to examine the earliest stages of human  
284 adipocyte development at scale, as the turnover rate of adipocytes in adult humans is exceedingly  
285 low, and therefore developmental trajectories cannot be captured at steady-state<sup>7</sup>. Indeed, in  
286 single-cell/single-nuclei profiles of human adipose tissues, progenitors and mature adipocytes are



287 projected as distinct spatial clusters but the developmental trajectory of adipocytes is not well  
288 captured<sup>29,30</sup>,

289  
290 A second key finding in our study is that the generation of cells in the reservoir pool is regulated  
291 expression of canonical Wnt target genes, including the specific marker *MGP*. Transcriptomic  
292 profiles of early multi-lineage differentiated cells revealed the *MGP*<sup>+</sup> cells also developed in  
293 response to osteogenic and chondrogenic induction (Extended Data Fig. 3d), implying the  
294 mechanism that actively maintains a multipotent mesenchymal progenitor cell pool is not unique  
295 to the adipose lineage. Through meta-analysis of internally generated and published  
296 transcriptomic data, we provide evidence that *MGP*<sup>+</sup> cells are present in ASPCs in human adult  
297 adipose tissue and they are likely maintained throughout lifetime. Moreover, in agreement with  
298 our observations, a recently posted<sup>31</sup> single-cell profiling study on adipose progenitors harvested  
299 from four different human adipose tissue depots find that these cells undergo two trajectories  
300 upon adipogenic induction. Thus, *MGP*<sup>+</sup> mesenchymal progenitors with ability to proliferate and  
301 retain multipotent potential are likely to be found in diverse human depots.

302  
303 Our study identified canonical Wnt signaling as a key factor for maintaining cells in a multipotent  
304 progenitor state. Much of our understanding of Wnt signaling comes from its role in epithelial cells,  
305 particularly in the intestine, and on the effects of aberrant Wnt signaling on the development of  
306 cancer<sup>32,33</sup>. In humans, nineteen *Wnt* ligands, belonging to twelve subfamilies, may act upon Wnt  
307 receptor complex composed of ten possible *Frizzled* proteins and *LRP5/6* receptors. Wnt-driven  
308 gene expression mediated by the  $\beta$ -*Catenin/TCF* transcription factors is collectively described as  
309 canonical Wnt signaling, and is dependent on intracellular regulators including *Dishevelled*, *Axin*,  
310 *GSK3* and *APC*, as well as extracellular regulators including *Dickkopf*-family (*DKK*) and *Secreted*  
311 *Frizzled Related Protein*-family (*SFRP*) proteins.

312

313 The Wnt signaling pathway elements involved in maintaining a pool of multipotent cells are  
314 inherently expressed in response to adipogenic stimuli, as no exogenous Wnt perturbagens were  
315 applied in our study. These signaling mechanism operate very early in the process of  
316 determination, as brief and mild perturbation of canonical Wnt activity early in adipogenic  
317 induction was sufficient to alter fate preference between progenitor maintenance and  
318 differentiation. Our results are consistent with the important role of Wnt in stem/progenitor cell  
319 maintenance in multiple tissues and organs <sup>1-3</sup>. Existing studies of the role of Wnt in adipogenesis,  
320 first described in 2000 <sup>12</sup>, were extensively reviewed recently by de Winter and Nusse <sup>34</sup>, who  
321 note that inactivation of Wnt signaling is necessary for mesenchymal progenitor lineage  
322 commitment, and further postulate that Wnt inhibits adipogenesis by promoting mesenchymal  
323 progenitor maintenance. Our findings provide direct evidence for that hypothesis, showing that  
324 Wnt signaling preserves cells in a progenitor state even in the context of strong adipogenic  
325 induction.

326  
327 Potential Wnt-dependent interactions between cells undergoing the adipocyte versus multipotent  
328 trajectories upon stimulation can be hypothesized based on the expressed ligand-receptor pairs.  
329 One of these is the *Ephrin B/Ephrin B receptor* pathway, where *Ephrin B* from *ADIPOQ*<sup>+</sup>  
330 adipocytes can signal to *Ephrin B receptor*-expressing *MGP*<sup>+</sup> cells. Wnt-mediated *Ephrin* signaling  
331 is known for directing development and cell positioning in the intestinal epithelium <sup>1</sup>. The spatial  
332 relationship between adipocytes and mesenchymal progenitors' niche are challenging to model,  
333 but Merrick et al. <sup>27</sup> find that in mice, progenitors expressing the Wnt target gene *Dpp4* reside in a  
334 specific, extracellular matrix-rich region of adipose tissue, from where they are mobilized under  
335 conditions of tissue remodeling. Mouse *Dpp4*<sup>+</sup> progenitor cells might be analogous to human  
336 *MGP*<sup>+</sup> cells, and reflect a reservoir of multipotent progenitors formed during tissue development  
337 that serve to repair and replenish the tissue during the life of the mouse. Other Wnt genes  
338 identified are secreted factors and regulators of Wnt signaling, including *SFRP2* and *DKK1*, which

339 may serve as a paracrine signal promoting adipogenesis and an autocrine negative feedback  
340 signal preventing overactivation of Wnt signaling. Further studies will focus on developing models  
341 for analyzing the topology of adipose tissue development and the underlying autocrine  
342 mechanisms.

343  
344 An additional observation made during our experiments is that Wnt has a potentially different role  
345 in supporting adipocyte development post-fate commitment. While brief inhibition of *Tankyrase*  
346 during adipogenic induction promotes adipogenesis, chronic inhibition of *Tankyrase*, which  
347 stabilizes *Axin* and suppresses  $\beta$ -*catenin* activity<sup>35</sup>, strongly suppresses adipocyte development  
348 without inducing toxicity (Extended Data Fig. 7). We hypothesize Wnt is also important for  
349 adipocyte development after fate determination, which is supported by the report of  $\beta$ -*catenin*  
350 requirement in adipose tissue lipogenesis demonstrated in an adipocyte-specific  $\beta$ -*catenin*  
351 knockout mouse model<sup>10</sup>. The distinct mechanisms by which Wnt signaling controls fate  
352 determination early upon differentiation induction and supports adipocyte development post-fate  
353 commitment remain to be elucidated.

354  
355 Our findings reveal orchestrated Wnt signaling at different stages of adipose tissue development.  
356 Variations in Wnt activity may be critical in determining mechanisms of adult adipose tissue  
357 expansion. As Wnt signaling is driven by specific combinations of Wnt ligand, extracellular and  
358 intracellular regulators, and receptor complexes, further characterization of adipose-context  
359 specific Wnt signaling may reveal opportunity for developing therapeutic interventions for  
360 improving adipose tissue function.

361

## 362 **MATERIALS & METHODS**

### 363 **Adipose tissue explants**

364 Methods for the harvesting and the culture adipose tissue explants were previously published  
365 (Min, et al., 2016). In short, subcutaneous adipose tissues were donated from consented adult  
366 patients (demographics listed in table below) undergoing elective panniculectomy surgery at  
367 University of Massachusetts Medical Center under UMass Institutional Review Protocol  
368 #14734\_13 and were subjected to harvesting within one to six hours. 200 explants of  
369 approximately 1cm<sup>3</sup> in size were embedded in Matrigel Matrix (Cat# 356231, Corning) per 10 cm  
370 dish with EGM-2MV (Cat# CC-3156,CC-4147, Lonza) media supplementation. The progenitors  
371 in explants were allowed to grow for 14 days in Matrigel with fresh media replacement every 2-3  
372 days. After 14 days, progenitors in explants were recovered using Dispase (Cat# 354235, Corning)  
373 for one hour followed by additional 14 minutes of Trypsin-EDTA (Cat# 15400-054, Gibco) and  
374 Collagenase I (Cat# LS004197, Worthington) and plated on standard tissue culture plate for  
375 expansion and cryopreservation.

| Donor # | Age | Gender | BMI  |
|---------|-----|--------|------|
| 37      | 57  | Female | 37.8 |
| 45      | 41  | Female | 32.9 |
| 48      | 59  | Female | 27.6 |
| 49      | 47  | Female | 24.3 |
| 57      | 41  | Female | 37.8 |
| 62      | 60  | Female | 38.3 |
| 65      | n/a | n/a    | n/a  |
| 68      | 33  | Female | 28.6 |

376

### 377 **Lineage differentiation**

378 Adipogenic differentiation was induced by providing confluent cells with DMEM (Cat# 11995-065,  
379 Gibco) and 10% Fetal Bovine Serum (FBS)(Cat# 25-514, Genesee Scientific) supplemented with  
380 0.5 mM 3-isobutyl-1-methylxanthine (Cat# I5879, Sigma), 0.25 µM dexamethasone (Cat# D1756,  
381 Sigma), and 5 µg/mL insulin (Cat# 15500, Sigma). The induced cells underwent half media  
382 replacement every 24 hours for 3 days. After 3 days, the media is replaced with fresh DMEM +  
383 10% FBS media every 2-3 days until harvest.

384

385 Chondrogenic differentiation was induced by providing confluent cells with DMEM and 10% FBS  
386 supplemented with 1 mM sodium pyruvate (Cat# 11360-070, Gibco), 100 nM dexamethasone  
387 (Cat# D1756, Sigma), 10 ng/mL Human TGF- $\beta$  1 recombinant protein (Cat# PHG9204, Gibco)  
388 and 1  $\mu$ g/mL L-Ascorbic acid 2-phosphate (Cat# A8960, Sigma). The induced cells underwent  
389 half media replacement every 2-3 days until harvest.

390  
391 Osteogenic differentiation was induced by providing confluent cells with DMEM and 10% FBS  
392 supplemented with 10 mM sodium beta-glycerolphosphate (Cat# L03425, Alfa Aesar), 100 nM  
393 dexamethasone (Cat# D1756, Sigma), 50  $\mu$ M L-Ascorbic acid 2-phosphate (Cat# A8960, Sigma).  
394 The induced cells underwent half media replacement every 2-3 days until harvest.

395  
396 Cells in the control condition were maintained in DMEM + 10% FBS and underwent identical  
397 media replacement schedule as the experimental group.

398  
399 **Lineage staining**  
400 Cells were washed with PBS and fixed with 10% formalin for 30 minutes at room temperature.  
401 Following fixation, cells were washed three times with double distilled water. To stain adipocyte  
402 lipid droplets, cells were first incubated in 60% isopropanol for 5 minutes followed by staining with  
403 2% Oil Red O (Cat# 00625, Sigma) in 60% isopropanol for 10 minutes. For assessment of  
404 chondrogenesis, cells were incubated with 1% Alcian Blue 8GX (Cat# A5268, Sigma) in 2:3 acetic  
405 acid and ethanol solution in the dark for 30 minutes with gentle agitation. For assessment of  
406 osteogenesis, cells were incubated with 2% Alizarin Red S staining solution (Cat# 0223, ScienCell)  
407 in the dark for 30 minutes with gentle agitation. After each staining protocol, the staining solution  
408 was removed, and cells were washed three times with double distilled water before imaging.

409

410 **RNA extraction for bulk RNA-sequencing and qPCR**

411 Cells in culture wells were washed with PBS before harvesting with TriPure TRIzol reagent (Cat#  
412 11 667 165 001, Roche). The cell- TRIzol mixtures were transferred to collection tubes and  
413 homogenized with TissueLyser II (Qiagen). Chloroform was added in a 1:5 ratio by volume and  
414 phase separation was performed. The RNA-containing layer was mixed with an equal volume of  
415 100% isopropanol and incubated overnight at -20 °C for precipitation. RNA was pelleted and  
416 washed with 80% ethanol and resuspended in nuclease-free water. RNA concentration and purity  
417 were determined using a NanoDrop 2000 (Thermo Scientific). RNA for sequencing were sent to  
418 University of Massachusetts Medical School Molecular Biology Core Lab for fragment analysis.

419

#### 420 **Bulk RNA-sequencing**

421 Library preparation was performed using TruSeq Stranded mRNA Low-Throughput Sample Prep  
422 Kit (Cat# 20020594, Illumina) according to manufacturer's instruction. The libraries were  
423 sequenced on the NextSeq 500 system (Illumina) using the NextSeq® 500/550 High Output Kits  
424 v2 (75 cycles; single-end sequencing; Cat# FC-404-2005, Illumina). The FASTQ files were  
425 processed using the DolphinNext pipeline <sup>36</sup> on the Massachusetts Green High Performance  
426 Computer Cluster (GHGCC). DolphinNext was configured to use RSEM for read mapping and  
427 transcript quantification <sup>37</sup>. Differentially expressed genes were identified using DESeq2 <sup>38</sup>.  
428 Pathway analysis was performed using the Gene Set Enrichment Analysis (GSEA) software with  
429 the MSigDB GO biological process gene sets ([http://www.gsea-](http://www.gsea-msigdb.org/gsea/msigdb/annotate.jsp)  
430 [msigdb.org/gsea/msigdb/annotate.jsp](http://www.gsea-msigdb.org/gsea/msigdb/annotate.jsp)) <sup>39</sup>. Sequencing results were submitted to GEO (accession  
431 number: GSE198275, GSE198481, GSE204847, GSE204848) and will be made publicly  
432 available upon publication of the manuscript.

433

#### 434 **Single cell RNA-sequencing**

435 Single-cell library preparation was performed using Chromium™ Single Cell 3' GEM Library & Gel  
436 Bead Kit v3 (Cat# 1000092, 10X Genomics) according to manufacturer's instruction. The libraries

437 were sequenced on the NextSeq 500 system (Illumina) using the NextSeq® 500/550 High Output  
438 Kits v2.5 (50 cycles; Cat# FC-404-2005, Illumina). The sequencing outputs were processed using  
439 the CellRanger software v3.1.0 on the Massachusetts Green High Performance Computer Cluster  
440 (GHPCC), Reads were mapped to human reference genome GRCh38 (Ensembl 93). Data  
441 analysis was performed using Seurat v4.1.0<sup>40</sup> within R version 4.0.2 environment. RNA velocity  
442 analysis was performed using the velocyto v0.17 command line tool and velocyto.R v0.6 R  
443 package<sup>41</sup>. Sequencing results were submitted to GEO (accession number: GSE198482).  
444 Sequencing results and analysis scripts will be made publicly available upon publication of the  
445 manuscript.

446

#### 447 **Quantitative PCR with reverse transcription (qRT-PCR)**

448 1 µg of RNA was reverse transcribed using the iScript cDNA Synthesis Kit (Cat# 1708891, Bio-  
449 Rad) according to manufacturer's protocol. Quantitative reverse-transcription PCRs were  
450 prepared with iQTM SYBR Green Supermix (Cat# 1708882, Bio-Rad) and were performed on a  
451 CFX Connect Real-Time PCR Detection System (Bio-Rad). The ADIPOQ primers have the  
452 following sequences: 5'-TGC TGG GAG CTG TTC TAC TG-3' forward and 5'-TAC TCC GGT  
453 TTC ACC GAT GTC-3' reverse. The MGP primers have the following sequences: 5'- CAG CAG  
454 AGA TGG AGA GCT AAA G -3' forward and 5'- GTC ATC ACA GGC TTC CCT ATT -3' reverse.  
455 The FRZB primers have the following sequences: 5'- GCC CTG GAA CAT GAC TAA GAT G -3'  
456 forward and 5'- GTA CAT GGC ACA GAG GAA GAA G -3' reverse. The COMP primers have the  
457 following sequences 5'- CCA ACT CAA GGC TGT GAA GTC -3' forward and 5'- GGA CTT CTT  
458 GTC CTT CCA ACC -3' reverse.

459

#### 460 **Image acquisition and processing**

461 Cells were imaged with LEICA DM 2500 LED inverted microscope equipped with a Leica MC120  
462 HD digital camera. Fiji/ImageJ v1.53c software was used to quantify lipid droplets. The images

463 were converted from RGB to 8-bit, background subtracted, contrast enhanced, thresholded and  
464 binarized followed by circular particle analysis (Extended Data Fig. 8).

465

#### 466 **Cell separation with Percoll density gradient**

467 A Percoll step density gradient was prepared in a 15ml conical tube with the Percoll solutions  
468 (Cat# P4937, Sigma). Earlier experiments (Fig. 4a-c) were performed in Percoll densities of 1.010  
469 g/mL, 1.020 g/mL and 1.040 g/mL, while later experiments were performed in Percoll densities of  
470 1.010 g/mL, 1.020 g/mL and 1.030 g/mL to permit high density cells to be collected from the cell  
471 pellet after centrifugation.

472

473 7-day adipogenic induced cell populations were lifted with StemPro Accutase (Cat# A1110501,  
474 ThermoFisher). Lifted cells were pelleted and resuspended in 1.010 g/mL Percoll solution and  
475 loaded onto the top of the prepared Percoll Gradient, followed by centrifugation at 1000g for 30  
476 minutes at room temperature. Cell fractions were observed by eye and each resulting fraction  
477 was pipetted into new conical tubes for further experimentations.

478

#### 479 **Ligand-receptor analysis**

480 First, we identified genes expressed in the *MGP*<sup>+</sup> and *ADIPOQ*<sup>+</sup> clusters. A gene was considered  
481 as expressed within a cell cluster if average normalized counts  $\geq 0.5$ . We then queried the  
482 putative or literature supported ligand-receptor pairs obtained from Ramilowski, et al., 2015 to  
483 identify gene pairs expressed in the *MGP*<sup>+</sup> and *ADIPOQ*<sup>+</sup> clusters.

484

#### 485 **Cell viability assays**

486 CellTiter-Glo 2.0 cell viability assay (Cat# G9243, Promega) and CellTox Green cytotoxicity assay  
487 (Cat# G8742, Promega) were performed according to manufacturer's instruction and the



488 fluorescence and luminescence signals were measured using a Safire 2 microplate reader  
489 (Tecan).

#### 490 **ELISA**

491 Adiponectin concentration in the conditioned medium was measured using the Adiponectin  
492 Human ELISA Kit (Cat# KHP0041, ThermoFisher) with a Safire 2 microplate reader (Tecan).

493

#### 494 **Small molecule inhibitors**

495 Tankyrase inhibitor XAV-939 (Cat# HY-15147), GSK3 inhibitor CHIR-99021 (Cat# HY-10182),  
496 and DPP4 inhibitors MK-043 (Cat# HY-13749) and LAF237 (Cat# HY-14291) were obtained from  
497 MedChemExpress.

498

#### 499 **CODE AVAILABILITY STATEMENT**

500

501 Code used in this study for the analysis of the single-cell RNA-seq data will be made available  
502 at <https://github.com/zingery/mesenchymal-maintenance/>.

503

#### 504 **ACKNOWLEDGEMENTS**

505

506 We thank MedChemExpress for their generosity in providing the Wnt compounds XAV939 and  
507 CHIR99021. This study was supported by NIH grants DK089101 and DK123028 to SC and  
508 GM135751 to JSR. We acknowledge the UMass Chan IT department for computing infrastructure.

509

#### 510 **AUTHOR CONTRIBUTIONS**

511

512 ZYL: conceptual design, experiment design and performance, data analysis, manuscript  
513 preparation. SJ: conceptual design and performance. JSR: hypothesis generation, conceptual  
514 design, experiment design and performance, data analysis, manuscript preparation. AD:  
515 experiment design and performance, data analysis. PS: conceptual design and performance.  
516 QY: conceptual design, manuscript preparation. TD: experiment design and performance, data  
517 analysis, manuscript preparation. TN: conceptual design, manuscript preparation. OAM:  
518 conceptual design, data generation, manuscript preparation. SC: supervision of work,

519 hypothesis generation, conceptual design, manuscript preparation.

520

521 **DECLARATION OF INTERESTS**

522

523 The authors declare no competing interests

524

525 **REFERENCES**

- 526 1. Battle, E., *et al.* Beta-catenin and TCF mediate cell positioning in the intestinal epithelium  
527 by controlling the expression of EphB/ephrinB. *Cell* **111**, 251-263 (2002).
- 528 2. Lim, X., *et al.* Interfollicular epidermal stem cells self-renew via autocrine Wnt signaling.  
529 *Science* **342**, 1226-1230 (2013).
- 530 3. Reya, T., *et al.* A role for Wnt signalling in self-renewal of haematopoietic stem cells.  
531 *Nature* **423**, 409-414 (2003).
- 532 4. Caplan, A.I. Mesenchymal stem cells. *J Orthop Res* **9**, 641-650 (1991).
- 533 5. Zuk, P.A., *et al.* Human adipose tissue is a source of multipotent stem cells. *Mol Biol Cell*  
534 **13**, 4279-4295 (2002).
- 535 6. Faust, I.M., Johnson, P.R., Stern, J.S. & Hirsch, J. Diet-induced adipocyte number  
536 increase in adult rats: a new model of obesity. *Am J Physiol* **235**, E279-286 (1978).
- 537 7. Spalding, K.L., *et al.* Dynamics of fat cell turnover in humans. *Nature* **453**, 783-787 (2008).
- 538 8. Das, S.K., *et al.* Body composition assessment in extreme obesity and after massive  
539 weight loss induced by gastric bypass surgery. *Am J Physiol Endocrinol Metab* **284**,  
540 E1080-1088 (2003).
- 541 9. Rosen, E.D. & MacDougald, O.A. Adipocyte differentiation from the inside out. *Nat Rev*  
542 *Mol Cell Biol* **7**, 885-896 (2006).
- 543 10. Bagchi, D.P., *et al.* Wnt/beta-catenin signaling regulates adipose tissue lipogenesis and  
544 adipocyte-specific loss is rigorously defended by neighboring stromal-vascular cells. *Mol*  
545 *Metab* **42**, 101078 (2020).
- 546 11. Cawthorn, W.P., *et al.* Wnt6, Wnt10a and Wnt10b inhibit adipogenesis and stimulate  
547 osteoblastogenesis through a beta-catenin-dependent mechanism. *Bone* **50**, 477-489  
548 (2012).
- 549 12. Ross, S.E., *et al.* Inhibition of adipogenesis by Wnt signaling. *Science* **289**, 950-953 (2000).
- 550 13. Stevens, J.R., *et al.* Wnt10b deficiency results in age-dependent loss of bone mass and  
551 progressive reduction of mesenchymal progenitor cells. *J Bone Miner Res* **25**, 2138-2147  
552 (2010).
- 553 14. Florez, J.C., *et al.* TCF7L2 polymorphisms and progression to diabetes in the Diabetes  
554 Prevention Program. *N Engl J Med* **355**, 241-250 (2006).
- 555 15. Grant, S.F., *et al.* Variant of transcription factor 7-like 2 (TCF7L2) gene confers risk of type  
556 2 diabetes. *Nat Genet* **38**, 320-323 (2006).

- 557 16. Kanazawa, A., *et al.* Association of the gene encoding wingless-type mammary tumor  
558 virus integration-site family member 5B (WNT5B) with type 2 diabetes. *Am J Hum Genet*  
559 **75**, 832-843 (2004).
- 560 17. Christodoulides, C., *et al.* WNT10B mutations in human obesity. *Diabetologia* **49**, 678-684  
561 (2006).
- 562 18. Tang, W., *et al.* White fat progenitor cells reside in the adipose vasculature. *Science* **322**,  
563 583-586 (2008).
- 564 19. Vishvanath, L., *et al.* Pdgfrbeta+ Mural Preadipocytes Contribute to Adipocyte Hyperplasia  
565 Induced by High-Fat-Diet Feeding and Prolonged Cold Exposure in Adult Mice. *Cell Metab*  
566 **23**, 350-359 (2016).
- 567 20. Berry, D.C., Jiang, Y. & Graff, J.M. Emerging Roles of Adipose Progenitor Cells in Tissue  
568 Development, Homeostasis, Expansion and Thermogenesis. *Trends Endocrinol Metab* **27**,  
569 574-585 (2016).
- 570 21. Jiang, Y., *et al.* A PPARgamma transcriptional cascade directs adipose progenitor cell-  
571 niche interaction and niche expansion. *Nat Commun* **8**, 15926 (2017).
- 572 22. Long, J.Z., *et al.* A smooth muscle-like origin for beige adipocytes. *Cell Metab* **19**, 810-  
573 820 (2014).
- 574 23. Tran, K.V., *et al.* The vascular endothelium of the adipose tissue gives rise to both white  
575 and brown fat cells. *Cell Metab* **15**, 222-229 (2012).
- 576 24. Gealekman, O., *et al.* Control of adipose tissue expandability in response to high fat diet  
577 by the insulin-like growth factor-binding protein-4. *J Biol Chem* **289**, 18327-18338 (2014).
- 578 25. Min, S.Y., *et al.* Human 'brite/beige' adipocytes develop from capillary networks, and their  
579 implantation improves metabolic homeostasis in mice. *Nat Med* **22**, 312-318 (2016).
- 580 26. Min, S.Y., *et al.* Diverse repertoire of human adipocyte subtypes develops from  
581 transcriptionally distinct mesenchymal progenitor cells. *Proc Natl Acad Sci U S A* **116**,  
582 17970-17979 (2019).
- 583 27. Merrick, D., *et al.* Identification of a mesenchymal progenitor cell hierarchy in adipose  
584 tissue. *Science* **364**(2019).
- 585 28. Solivan-Rivera, J., *et al.* A NEUROGENIC GENE EXPRESSION SIGNATURE  
586 SUPPORTS HUMAN THERMOGENIC ADIPOSE TISSUE DEVELOPMENT IN VIVO.  
587 *bioRxiv*, 2021.2012.2029.474474 (2021).
- 588 29. Emont, M.P., *et al.* A single-cell atlas of human and mouse white adipose tissue. *Nature*  
589 (2022).

- 590 30. Sun, W., *et al.* snRNA-seq reveals a subpopulation of adipocytes that regulates  
591 thermogenesis. *Nature* **587**, 98-102 (2020).
- 592 31. Palani, N., *et al.* Temporal trajectories of human brown and white adipocyte progenitors  
593 at single cell resolution. (Research Square, 2022).
- 594 32. Rim, E.Y., Clevers, H. & Nusse, R. The Wnt Pathway: From Signaling Mechanisms to  
595 Synthetic Modulators. *Annu Rev Biochem* (2022).
- 596 33. Albrecht, L.V., Tejada-Munoz, N. & De Robertis, E.M. Cell Biology of Canonical Wnt  
597 Signaling. *Annu Rev Cell Dev Biol* **37**, 369-389 (2021).
- 598 34. de Winter, T.J.J. & Nusse, R. Running Against the Wnt: How Wnt/beta-Catenin  
599 Suppresses Adipogenesis. *Front Cell Dev Biol* **9**, 627429 (2021).
- 600 35. Huang, S.M., *et al.* Tankyrase inhibition stabilizes axin and antagonizes Wnt signalling.  
601 *Nature* **461**, 614-620 (2009).
- 602 36. Yukselen, O., Turkyilmaz, O., Ozturk, A.R., Garber, M. & Kucukural, A. DolphinNext: a  
603 distributed data processing platform for high throughput genomics. *BMC Genomics* **21**,  
604 310 (2020).
- 605 37. Li, B. & Dewey, C.N. RSEM: accurate transcript quantification from RNA-Seq data with or  
606 without a reference genome. *BMC Bioinformatics* **12**, 323 (2011).
- 607 38. Love, M.I., Huber, W. & Anders, S. Moderated estimation of fold change and dispersion  
608 for RNA-seq data with DESeq2. *Genome Biol* **15**, 550 (2014).
- 609 39. Subramanian, A., *et al.* Gene set enrichment analysis: a knowledge-based approach for  
610 interpreting genome-wide expression profiles. *Proc Natl Acad Sci U S A* **102**, 15545-15550  
611 (2005).
- 612 40. Hao, Y., *et al.* Integrated analysis of multimodal single-cell data. *Cell* **184**, 3573-3587  
613 e3529 (2021).
- 614 41. La Manno, G., *et al.* RNA velocity of single cells. *Nature* **560**, 494-498 (2018).

615  
616  
617  
618  
619  
620  
621

622 FIGURES AND LEGENDS

623 FIGURE 1

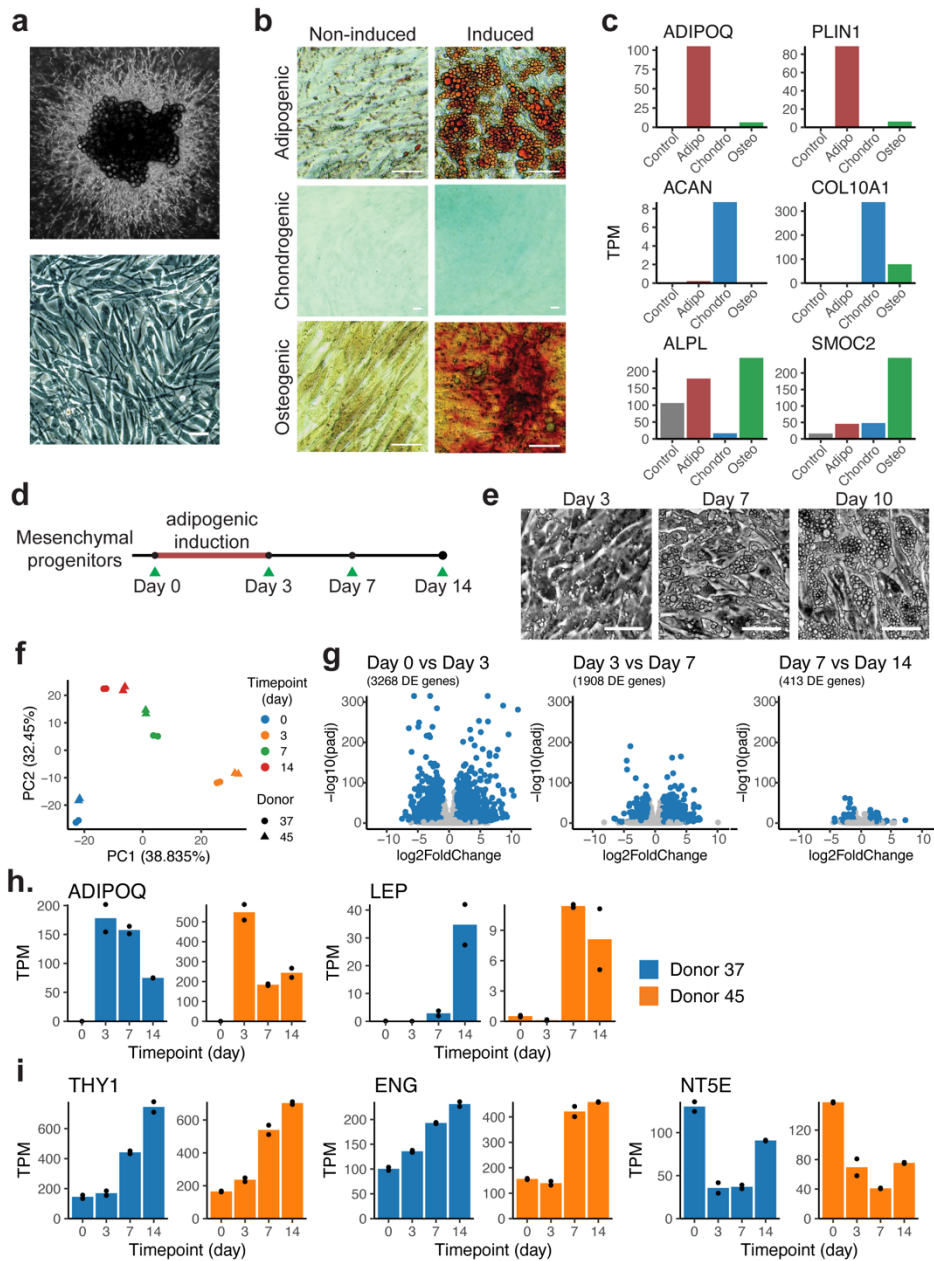

643 **Figure 1. Dynamic transcriptomic changes in multipotent mesenchymal progenitors from**  
 644 **human adipose tissue undergoing adipogenic differentiation. a.** Mesenchymal progenitor  
 645 cells expanded from adipose tissue explants in 3-dimensional culture (top panel), plated grown to  
 646 confluence in 2-dimensional culture dishes (bottom panel; scale bar, 50  $\mu\text{m}$ ). **b.** Images of  
 647 progenitors induced toward adipogenic, chondrogenic or osteogenic cell fates for 10 days.

648 Adipogenic-induced cells were stained with Oil Red O, chondrogenic-induced cells with Alcian  
649 Blue 8GX, and osteogenic-induced cells with Alizarin Red S. Scale bar, 50  $\mu$ m. **c.** Marker genes  
650 for progenitors differentiated toward adipogenic, chondrogenic, and osteogenic lineages identified  
651 using their transcriptomic profile. Bars are means of technical replicates from n=1 wells subjected  
652 to the indicated differentiation cocktails. *ADIPOQ*: *Adiponectin*, *PLIN1*: *Perilipin 1*, *ACAN*:  
653 *Aggrecan*, *COL10A1*: *Collagen Type X Alpha 1 Chain, Chondrocyte specific*, *ALPL*: *Alkaline*  
654 *Phosphatase*, *SMOC2*: *SPARC/Osteonectin-Related Modular Calcium-Binding Protein 2*. **d.**  
655 Schematic of the adipogenesis time-course study. **e.** Representative images of mesenchymal  
656 cells induced toward adipogenic fate for 3, 7, and 10 days. Scale bar, 50  $\mu$ m. **f.** Scatter plot of the  
657 first two principal components of bulk RNASeq results from two independent cultures, each from  
658 two independent donors, separately expanded, and used to obtain RNA at 0, 3, 7, or 14 days post  
659 adipogenic induction. Principal component analysis (PCA) was performed on the expression of  
660 the top 1000 most variable genes across all n=16 samples. **g.** Volcano plots of the differential  
661 gene expression analysis results between consecutive time points. **h,i.** Time courses of  
662 adipokines *Adiponectin (ADIPOQ)* and *Leptin (LEP)*, and of mesenchymal progenitor markers  
663 *THY1 (CD90)*, *ENG (CD105)*, and *NT5E (CD73)*.

664

665

666

667

668

669

670

671

672

673



674

675 **FIGURE 2**

676

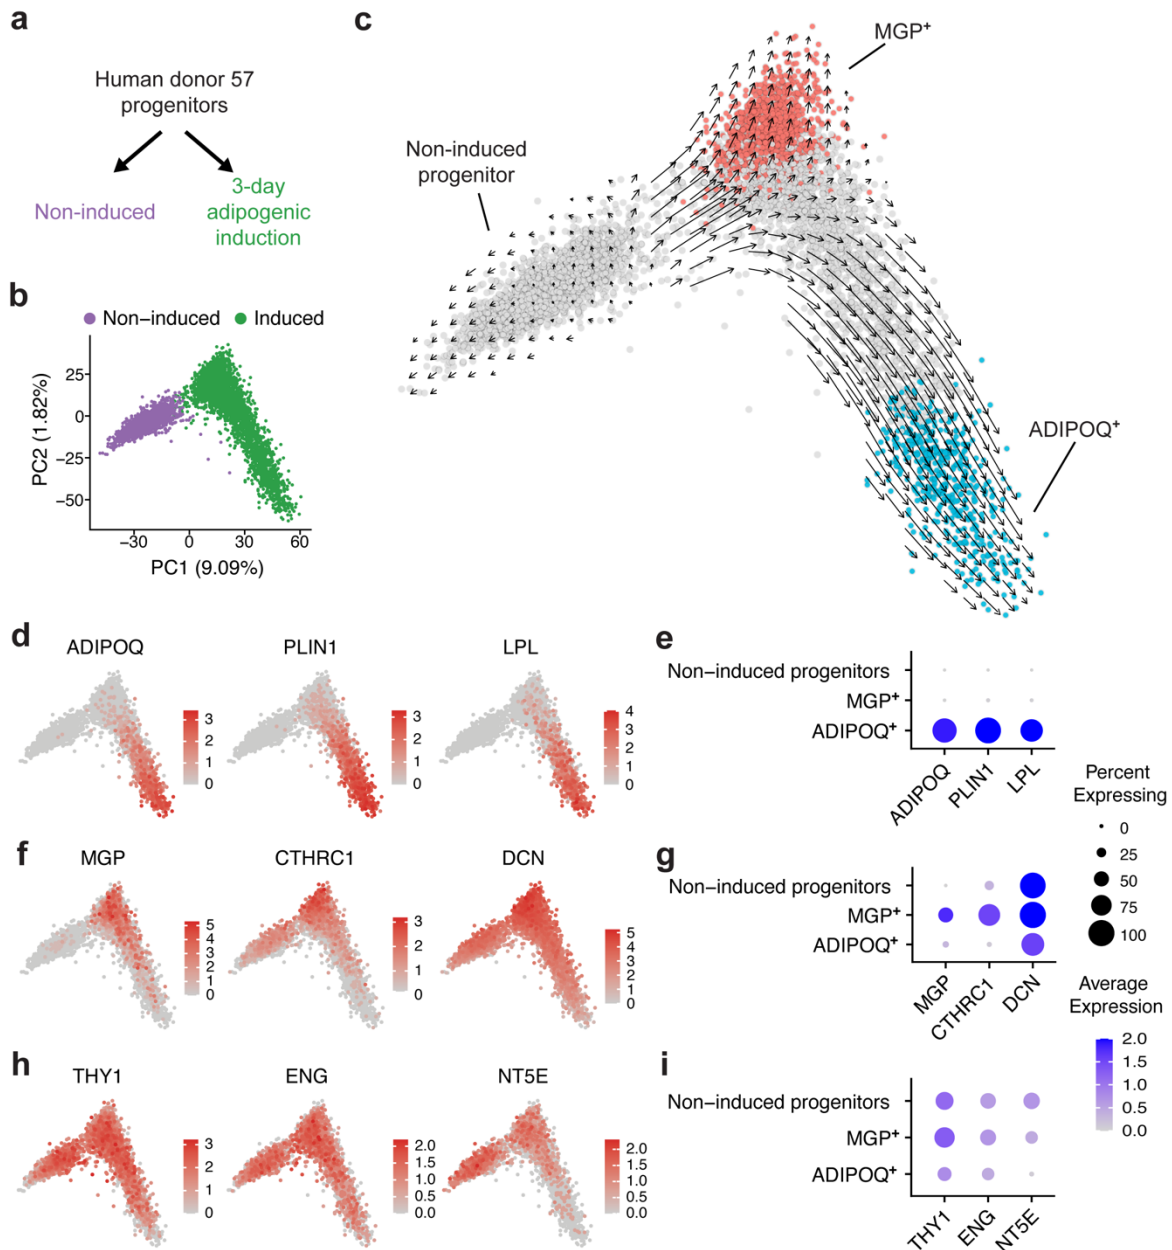

677

678 **Figure 2. Single-cell RNA-seq of induced adipose progenitors. a.** Schematic of the early

679 adipogenesis single-cell transcriptomic profiling study. **b.** PCA projection of the single-cell profile

680 of 6615 cells (3226 non-induced, 3430 adipogenic-induced, mean number of genes per cell =



681 3382). **c.** Inference of developmental trajectory with RNA velocity. Red and blue colored cells  
682 represent clusters at the terminals of two projected fate trajectories. **d,e.** Representative adipocyte  
683 marker genes in PCA projection and dot plots. *ADIPOQ*: *Adiponectin*, *PLIN1*: *Perilipin*, *LPL*:  
684 *Lipoprotein Lipase*. **f,g.** Representative *MGP*<sup>+</sup> cluster marker genes in PCA projections and dot  
685 plots. *MGP*: *Matrix Gla Protein*, *CTHRC1*: *Collagen Triple Helix Repeat Containing 1*, *DCN*:  
686 *Decorin*. **h,i.** Mesenchymal progenitor marker genes in PCA projections and dot plots.  
687

688  
689 **FIGURE 3**  
690

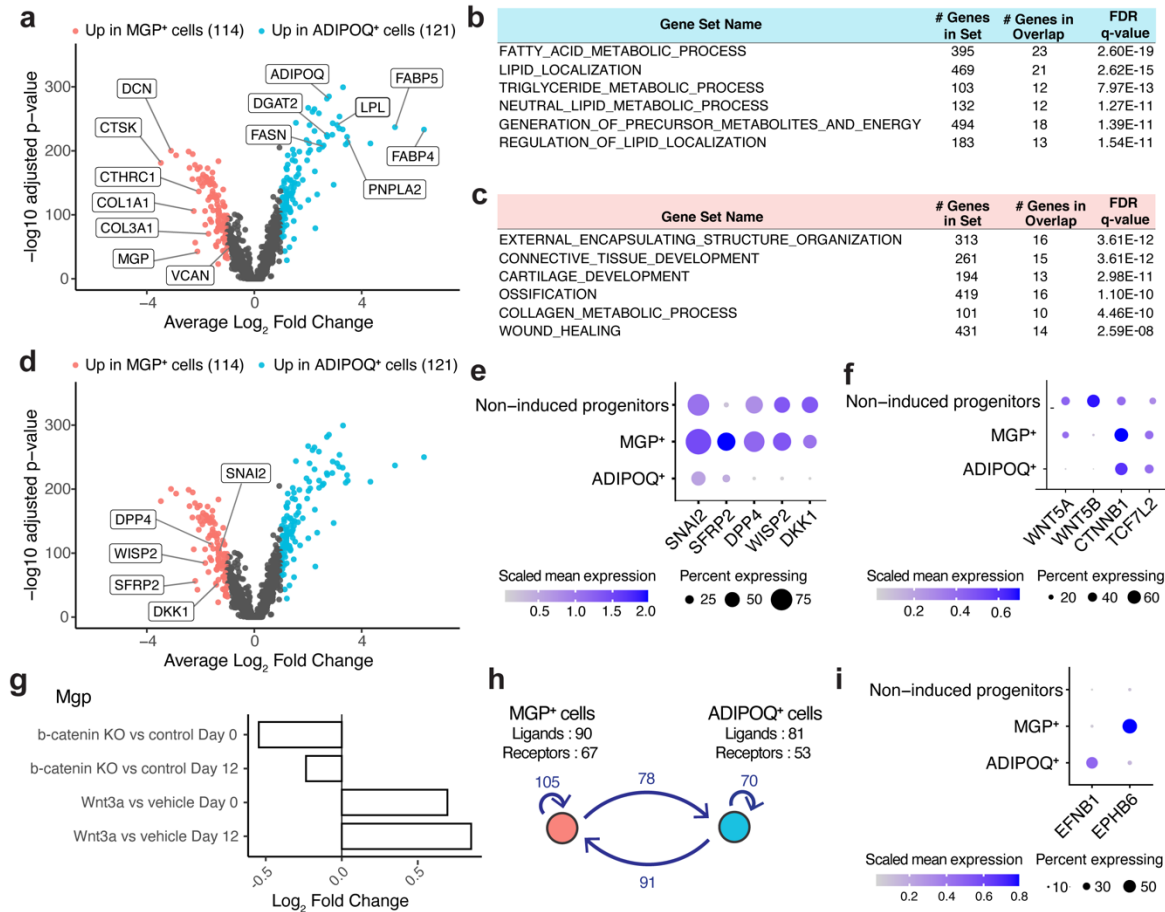

691 **Figure 3. Active canonical Wnt signaling in MGP<sup>+</sup> cells . a.** Volcano plot comparing MGP<sup>+</sup> and  
692 ADIPOQ<sup>+</sup> cell gene expression, with most differentially expressed genes highlighted. Tested  
693 features were limited to genes detected in >25% cells in at least one of the clusters. Differentially  
694 expressed genes were defined as those with log<sub>2</sub> fold change > 1 and adjusted p-value < 0.001.  
695 **b.** Top 6 significantly enriched gene sets of genes up-regulated in the ADIPOQ<sup>+</sup> cells. **c.** Top 6  
696 significantly enriched gene sets of genes up-regulated in the MGP<sup>+</sup> cells. **d.** Identical volcano plot  
697 as **a**, with canonical Wnt target genes highlighted. **e.** Dot plot of the canonical Wnt target genes  
698 that were significantly up-regulated in MGP<sup>+</sup> cells. **f.** Dot plot of the Wnt ligand and core Wnt  
699 pathway members. **g.** bar graph of log<sub>2</sub> fold change values of Mgp from four separate differential

700 expression analyses of primary mouse mesenchymal progenitors isolated directly from *β-Catenin*  
701 <sup>fl/fl</sup> mice. Non-adipogenic-induced progenitor (annotated as “Day 0”) or progenitors underwent 12-  
702 day adipogenic induction (annotated as “Day 12”) were harvested for RNA-seq under Wnt  
703 perturbations: Day 0 or Day 12 cells were either induced for *β-Catenin* knockout (annotated as  
704 “KO”) or were treated with 20 ng/ml recombinant Wnt3a or vehicle for 4 hours before harvest (*n*=4  
705 per group). **h.** Ligand-receptor analysis identifies multiple ligand-receptor interacting pairs  
706 between the *MGP*<sup>+</sup> and *ADIPOQ*<sup>+</sup> cells. **i.** Dot plot of *Ephrin-B Receptor 6 (EPHB6)* and *Ephrin*  
707 *B1 (EFNB1)* in *MGP*<sup>+</sup> or *ADIPOQ*<sup>+</sup> cells.  
708

709 FIGURE 4  
710

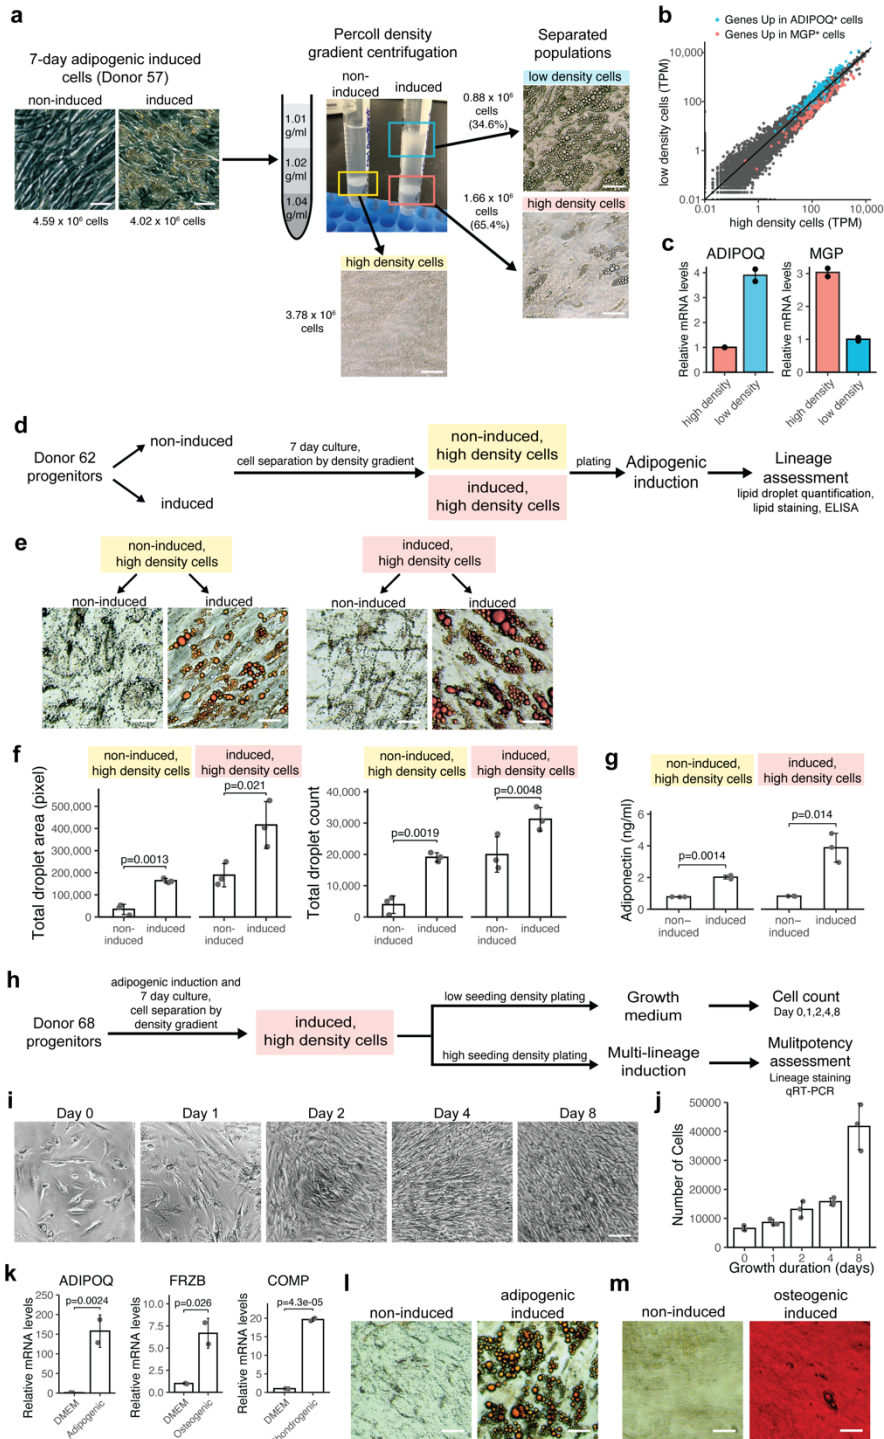

711 **Figure 4. MGP<sup>+</sup> cells are multipotent mesenchymal progenitors.** **a.** Schematic and images  
712 of the cell separation assay. Non-induced or 7-day adipogenic induced cells from Donor 57 were  
713 subjected to Percoll density gradient centrifugation. Scale bars, 50 μm. **b.** Scatter plot of each

714 detected gene's transcript per million (TPM) values between the high- and low-density cells  
715 measured by bulk RNA-sequencing. Genes highlighted in blue were the 121 genes enriched in  
716 the *ADIPOQ*<sup>+</sup> cells, as identified by the differential expression analysis of single-cell RNA-seq  
717 presented in Fig. 3a, and genes highlighted in red were the 114 genes enriched in the *MGP*<sup>+</sup> cells.  
718 **c.** qRT-PCR assessment of *ADIPOQ* and *MGP* mRNA levels in the high- and low-density cells  
719 extracted from 7-day adipogenic induced cells. Plotted are means of  $n=2$  independent  
720 experiments each assayed with technical duplication. **d.** Schematic of the experiment assessing  
721 adipogenic potential of the high density cells obtained from a density gradient centrifugation. **e.**  
722 Oil Red O staining of the high density cells after additional 7-day adipogenic induction. Scale bar  
723 50  $\mu\text{m}$ . **f.** Lipid droplet count and droplet area quantification of the high density cells after  
724 additional 7-day adipogenic induction (error bars = SD,  $n = 3$ , exact p-values shown were  
725 determined by unpaired two-tailed *t*-tests). **g.** Adiponectin level in the conditioned media of high  
726 density cells after additional 7-day adipogenic induction, measured by ELISA (error bars = SD,  $n$   
727 = 3, exact p-values shown were determined by unpaired two-tailed *t*-tests). **h.** Schematic of the  
728 experiment assessing multipotent and proliferative potential of the high density cells obtained  
729 from a density gradient centrifugation of 7-day adipogenic induced cells. For low seeding density  
730 plating, 10000 cells were plated per well in a 96-well plate; for high seeding density plating, 30000  
731 cells were plated per well in a 96-well plate. **i.** Phase images of the induced, high density cells  
732 after indicated days in progenitor growth medium. Scale bar, 100  $\mu\text{m}$ . **j.** Cell counts of the induced,  
733 high density cells after indicated days in progenitor growth medium (error bars = SD,  $n = 3$ ). **k.**  
734 mRNA levels of adipogenic (*ADIPOQ*), chondrogenic (*COMP*), and osteogenic (*FRZB*) lineage  
735 markers of induced, high density cells after 10-day lineage differentiation (error bars = SD,  $n = 2$ ,  
736 exact p-values shown were determined by unpaired two-tailed *t*-tests). **l.** Oil Red O staining of  
737 induced, high density cells after 10-day adipogenic induction. Scale bar, 50  $\mu\text{m}$ . **m.** Alizarin Red  
738 S staining of induced, high density cells after 10-day osteogenic induction. Scale bar, 50  $\mu\text{m}$ .  
739

740 **FIGURE 5**

741

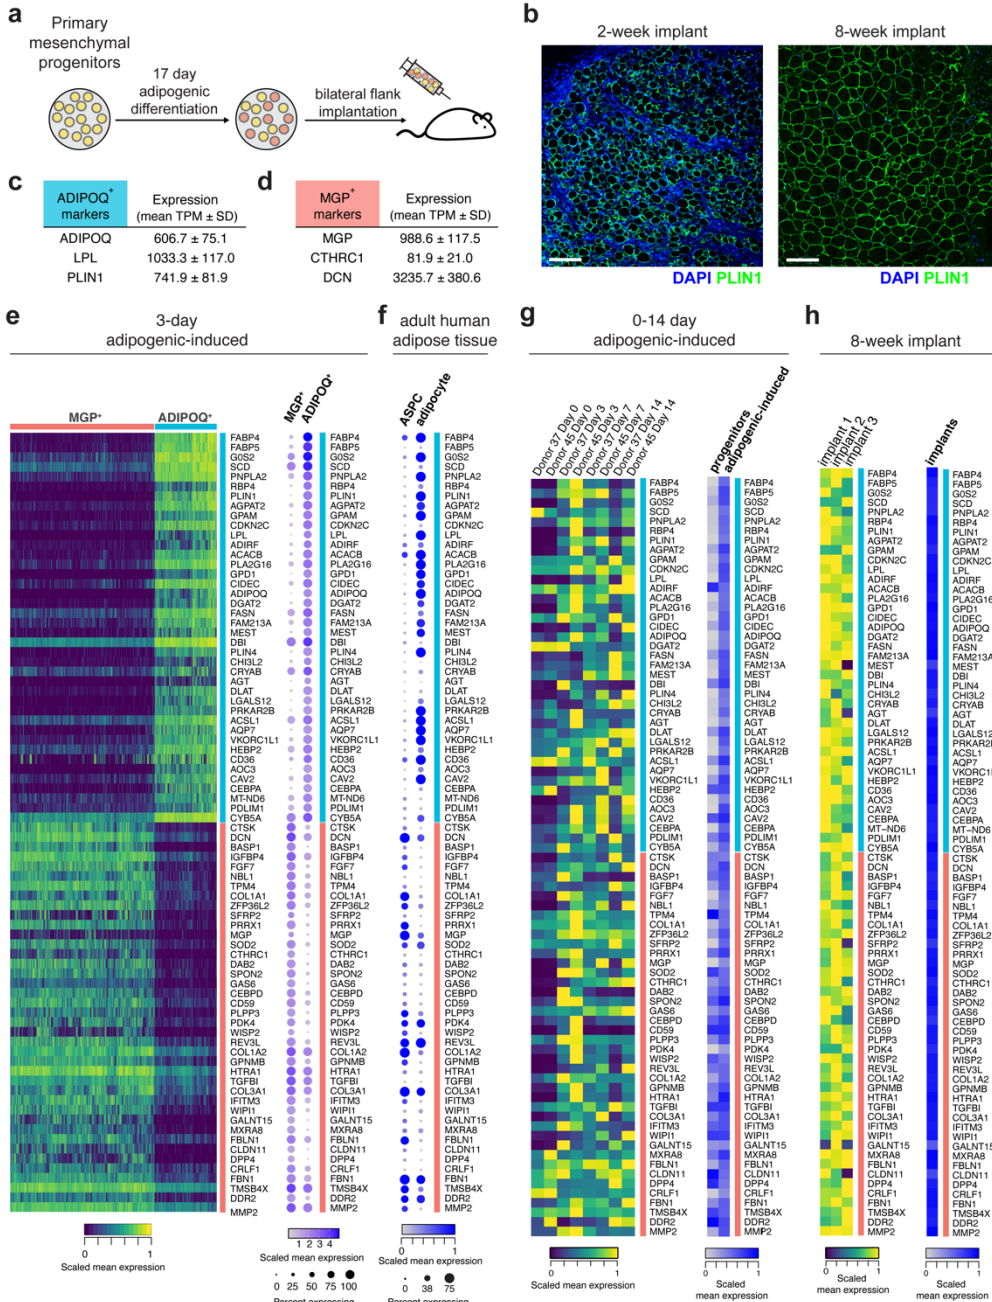

781

782

**Figure 5. MGP<sup>+</sup> cells are maintained over time in culture, and *in vivo*.** **a.** Schematic of the

783

human adipogenic-induced progenitor mouse implantation model. **b.** Histological sections of

784

implants 2 weeks (left panel) and 8 weeks (right panel) after injection. **c,d.** mRNA levels of the

785

ADIPOQ<sup>+</sup> and MGP<sup>+</sup> cell markers in the implants measured by bulk RNA-seq. **e.** Heatmap of

786

individual cells and summary dot plot of gene expressions of the top 40 differentially expressed

787 gene from *MGP*<sup>+</sup> and *ADIPOQ*<sup>+</sup> cells, derived from the single-cell dataset described in Fig.2. **f.**  
788 Dot plot of gene expression of the top 40 marker gene of *MGP*<sup>+</sup> and *ADIPOQ*<sup>+</sup> cells in the  
789 published single-cell/single-nuclei adipose tissue transcriptome of adult human ages 29-73 years  
790 published by Emont, et al. <sup>29</sup>. **g.** Heatmap of gene expression of the top 40 differentially expressed  
791 gene of *MGP*<sup>+</sup> and *ADIPOQ*<sup>+</sup> cells from the adipogenesis time course bulk RNA-seq dataset  
792 described in Fig. 1d, presented as individual samples (left panel) or summarized by adipogenic  
793 induction status (right panel). **h** Heatmap of expression of the top 40 differentially expressed gene  
794 of *MGP*<sup>+</sup> and *ADIPOQ*<sup>+</sup> cells from the human reads of the implant dataset presented in Fig. 5a,  
795 presented as individual samples (left panel) or summarized (right panel).  
796



797 **FIGURE 6**

798

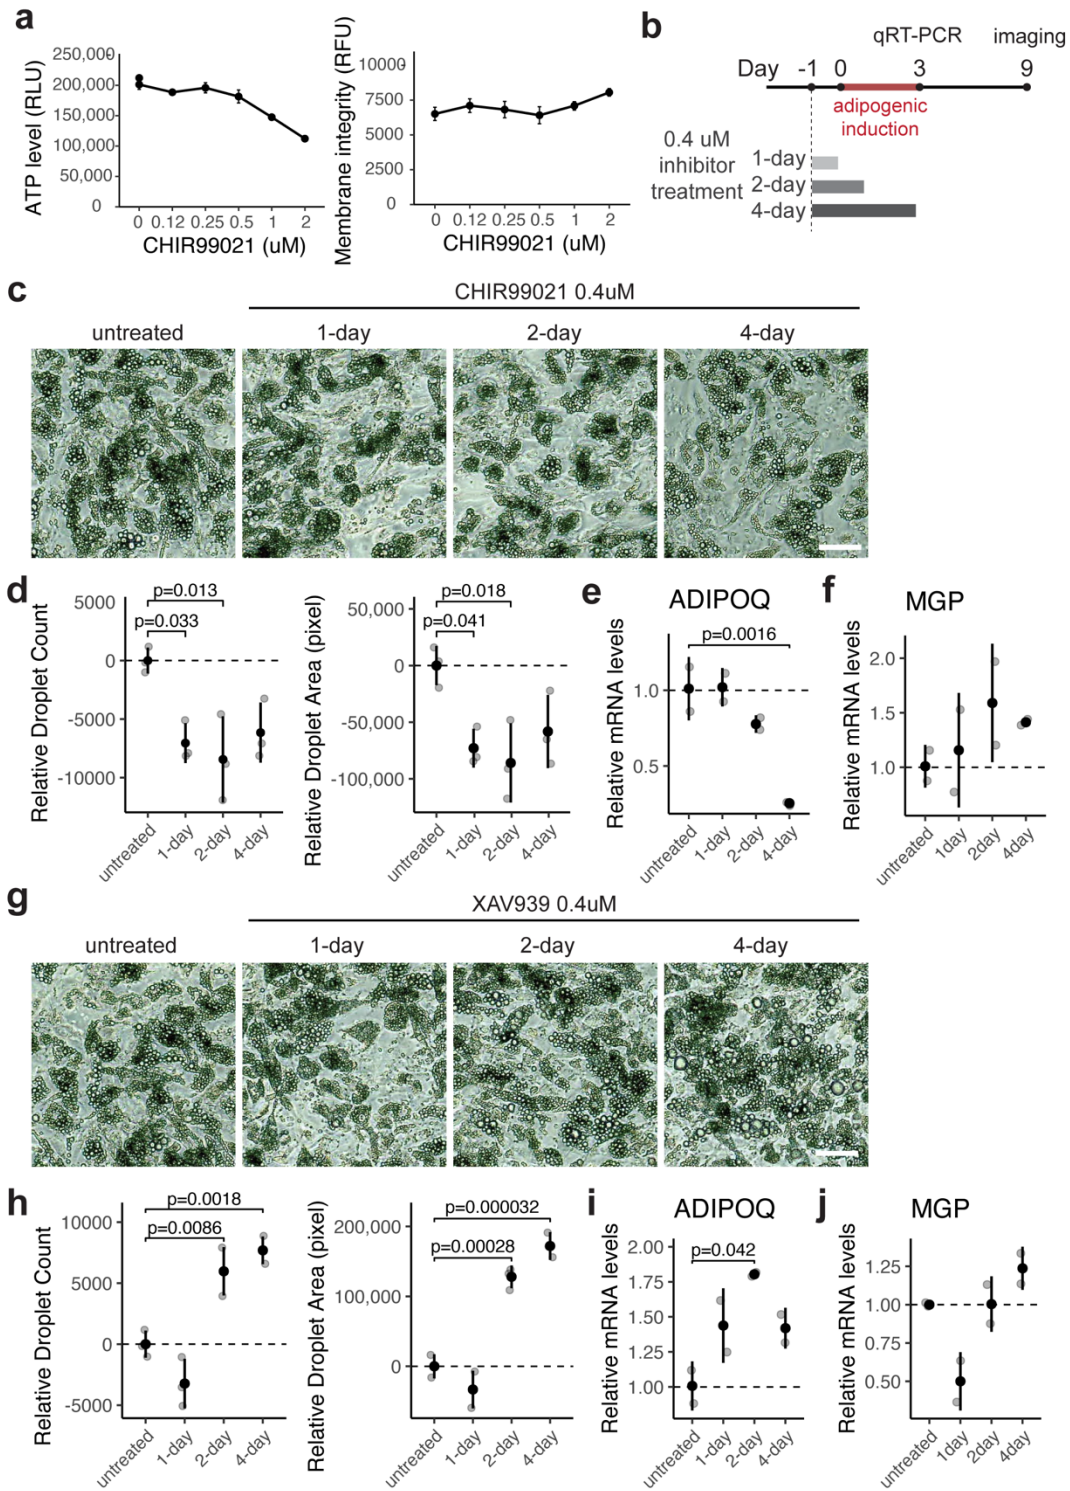



799 **Figure 6. Canonical Wnt signaling controls cell fate balance between adipogenic**  
800 **differentiation and progenitor maintenance. a.** ATP levels (left panel) and membrane  
801 permeability (right panel) in 10-day adipogenic-induced cells exposed every 24h to different  
802 CHIR99021 at the concentrations indicated (error bars = SD,  $n = 3$ ). **b.** Schematic of the assay to  
803 assess effects of low dose, acute Wnt inhibition. **c.** Images of cells treated with 0.4uM CHIR99021  
804 as indicated in **b**, after 9 days of differentiation. Scale bars, 50  $\mu\text{m}$ . **d.** Lipid droplet quantification  
805 of cells illustrated in **c** (error bars = SD,  $n = 3$ ,  $*p\text{-value} \leq 0.05$ , determined by one-way ANOVA).  
806 **e,f.** *ADIPOQ* and *MGP* mRNA levels of cells treated with 0.4uM CHIR99021 as indicated in **b**,  
807 after 3 days of differentiation (error bars = SD,  $n = 2$ , exact p-values shown were determined by  
808 one-way ANOVA). **g.** Images of cells treated with 0.4uM XAV939 as indicated in **b**, after 9 days  
809 of differentiation. Scale bars, 50  $\mu\text{m}$ . **h.** Lipid droplet quantification of cells illustrated in **g** (error  
810 bars = SD,  $n = 3$ , exact p-values shown were determined by one-way ANOVA). **i,j.** *ADIPOQ* and  
811 *MGP* mRNA levels of cells treated with 0.4uM XAV939 treatment measured by qRT-PCR after 3  
812 days of differentiation (error bars = SD,  $n = 2$ , exact p-values shown were determined by one-way  
813 ANOVA).

814

815

816

817

818

819

820

821

822

823

824

825  
826  
827  
828

**EXTENDED DATA FIGURES**

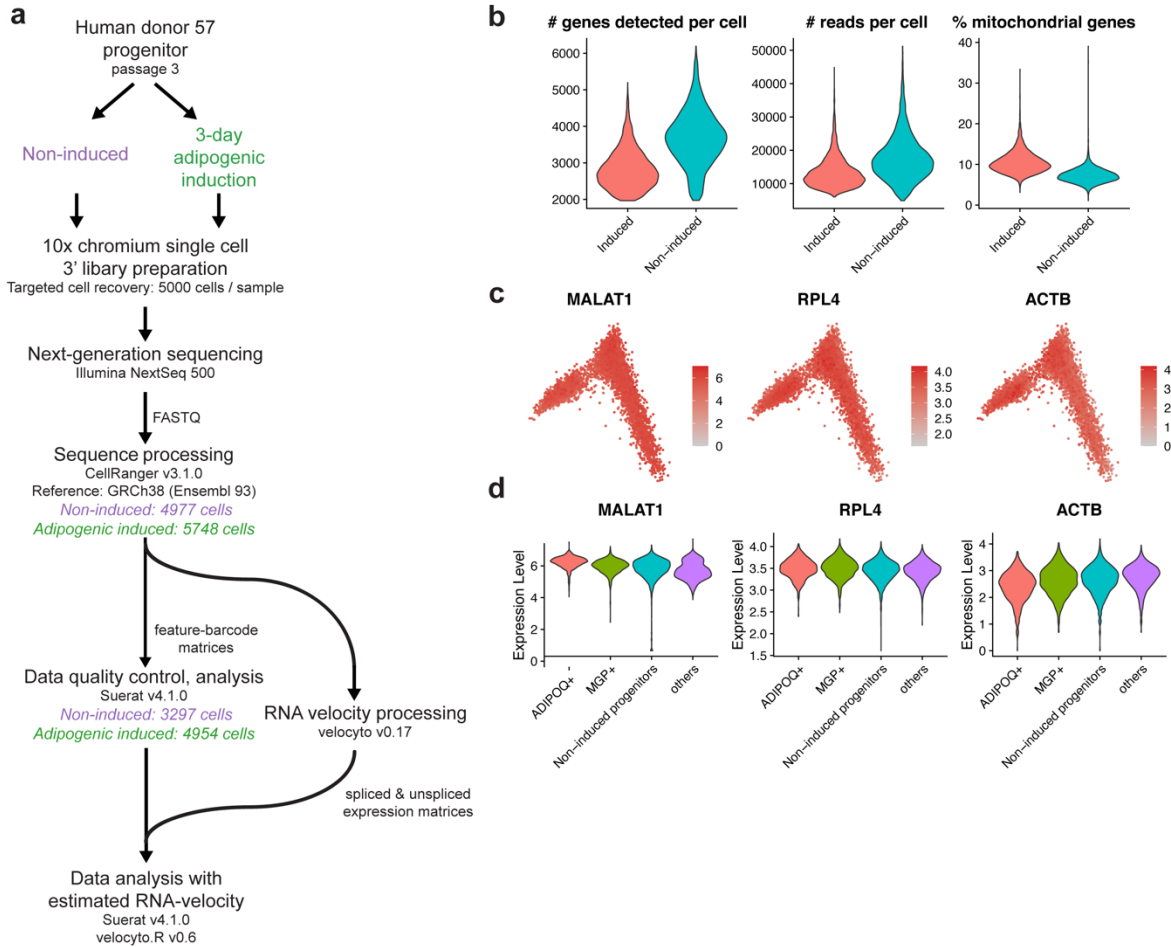

829  
830  
831  
832  
833  
834  
835

**Extended Data Fig. 1. Processing and quality control of the single-cell RNA-seq profiling of non-induced and 3-day adipogenic induced progenitors. a.** Schematic of the sample and bioinformatics processing of the study. **b.** Violin plots of the number of genes/reads detected and estimated percentage of mitochondrial genes in cells that had passed quality control. **c** Selected housekeeping genes' expression in PCA projection. **d.** Violin plot of gene expression distribution of selected housekeeping genes.

836

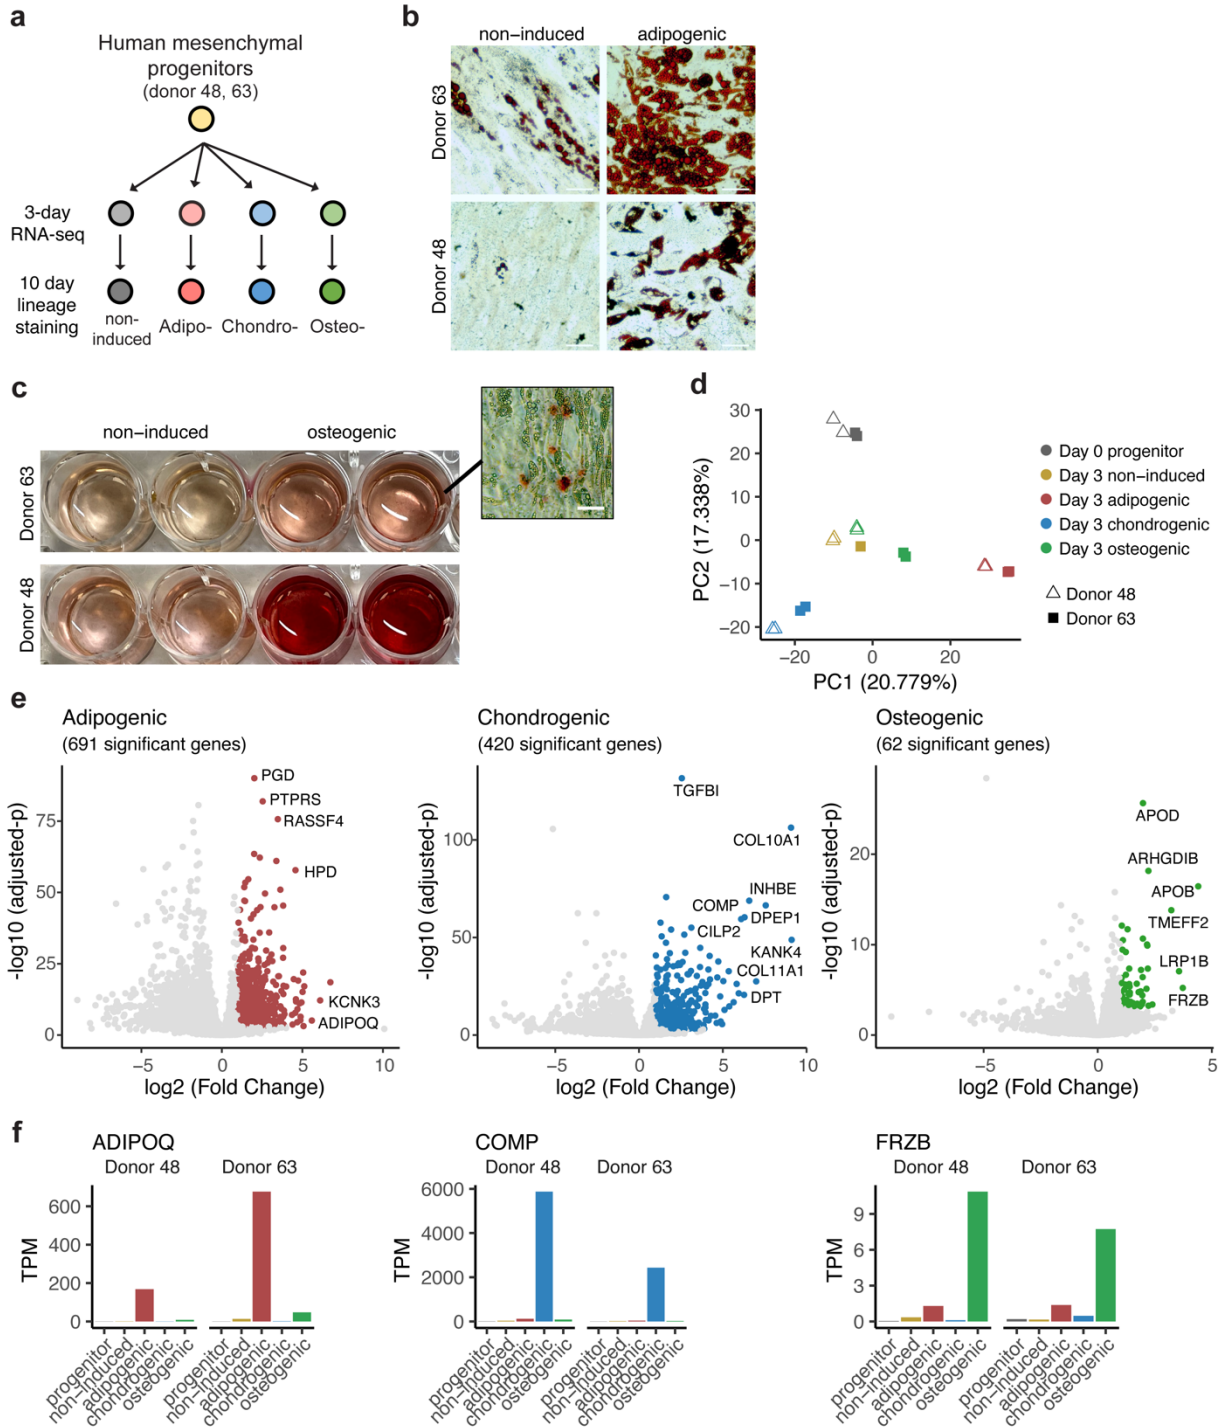

837 **Extended Data Fig. 2. Identification of early osteogenic and chondrogenic lineage marker**

838 **with multi-lineage time course bulk RNA-seq.** a, Schematic of the RNA-seq profiling study.

839 Two donor-derived cells separately expanded at two biological replicates were used to obtain

840 RNAs at 3 days post differentiation induction for bulk RNA-sequencing. **b**, Oil Red O staining of  
841 progenitor cells underwent 10-day adipogenic induction. Scale bars, 50  $\mu$ m. **c**, Alizarin Red S  
842 staining of progenitor cells underwent 10-day osteogenic induction. **d**, Scatter plot of the first  
843 two principal components of the RNA-seq samples. Principal component analysis was  
844 performed on the expression of the top 1000 most variable genes across all samples. **e**,  
845 Volcano plots of differential gene expression analysis results of the transcriptome profiles  
846 between cells induced toward the annotated lineage and other 3-day induced samples.  
847 Differentially expressed genes were defined as those with log<sub>2</sub> fold change > 1 and adjusted p-  
848 value < 0.001. **f**, Gene expression profile of distinctive lineage marker identified from the  
849 differential expression analysis. Markers were selected based on magnitude and significance in  
850 the differential expression analysis as well as specificity. *ADIPOQ*: *Adiponectin*, *COMP*:  
851 *Cartilage Oligomeric Matrix Protein*, *FRZB*: *Frizzled Related Protein*.

852

853

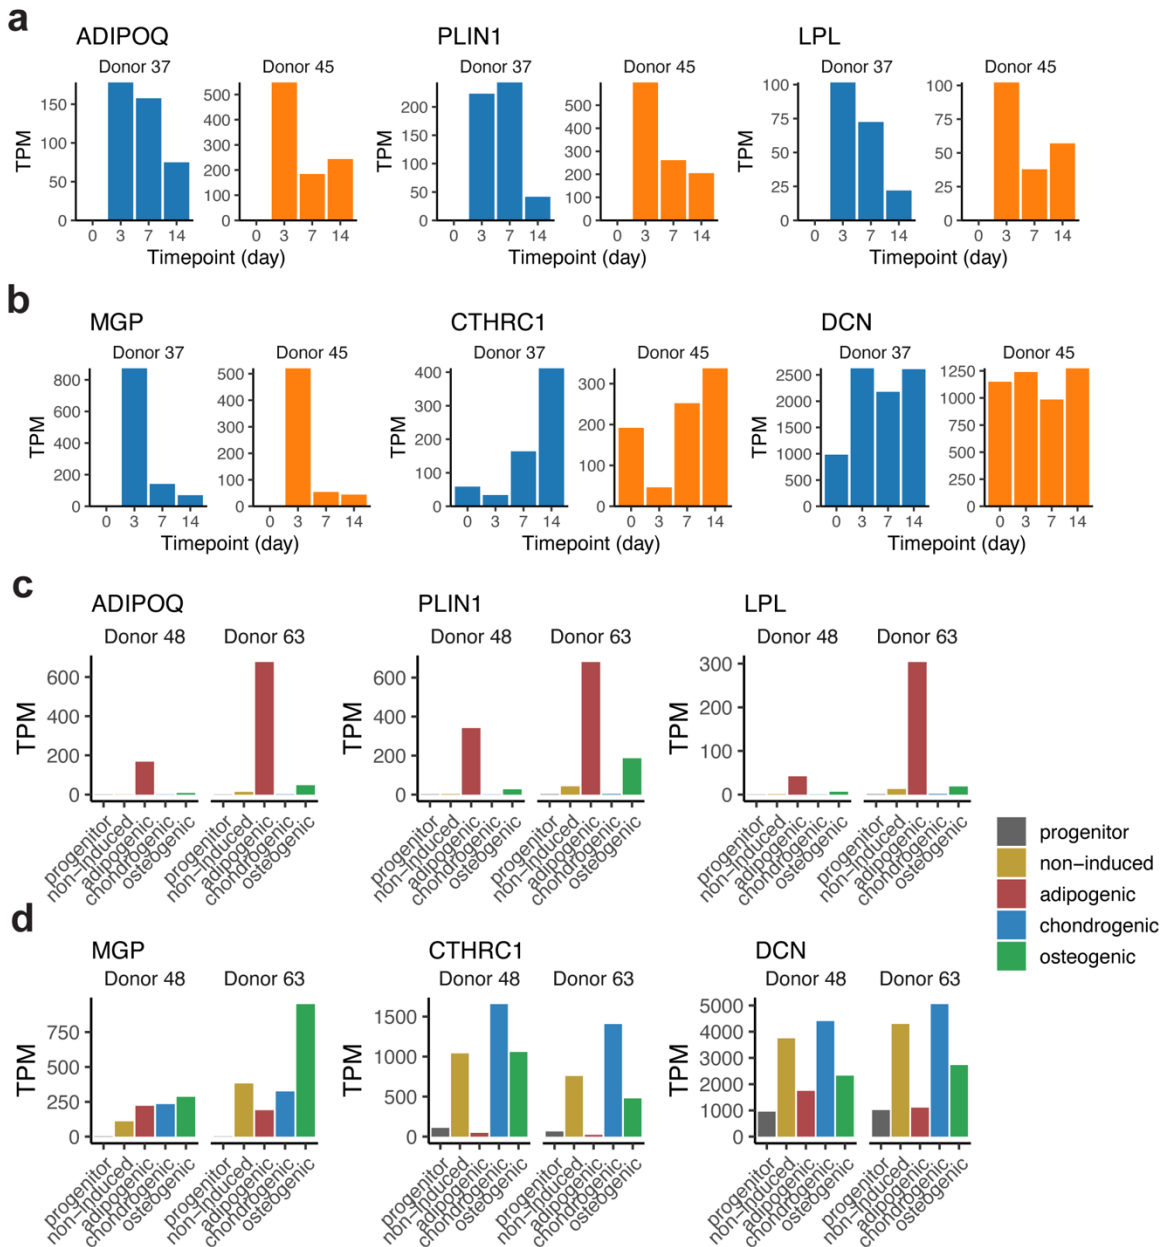

854

855 **Extended Data Fig. 3. Gene expression profiles of markers identified from the single-cell**

856 **RNA-seq or multi-lineage bulk RNA-seq datasets of induced adipose progenitors in**

857 **adipogenesis time course. a. Gene expression profiles of *ADIPOQ*<sup>+</sup> cell markers in the**

858 **adipogenesis time course RNA-seq dataset presented in Fig. 1d. b. Gene expression profiles of**

859 ***MGP*<sup>+</sup> cell markers in the adipogenesis time course RNA-seq dataset presented in Fig. 1d. c.**

860 Gene expression profiles of *ADIPOQ*<sup>+</sup> cell markers in the 3-day multi-lineage RNA-seq dataset  
 861 described in Extended Data Fig. 2. **d.** Gene expression profiles of *MGP*<sup>+</sup> cell markers in the  
 862 adipogenesis time course RNA-seq dataset described in Extended Data Fig. 2.  
 863

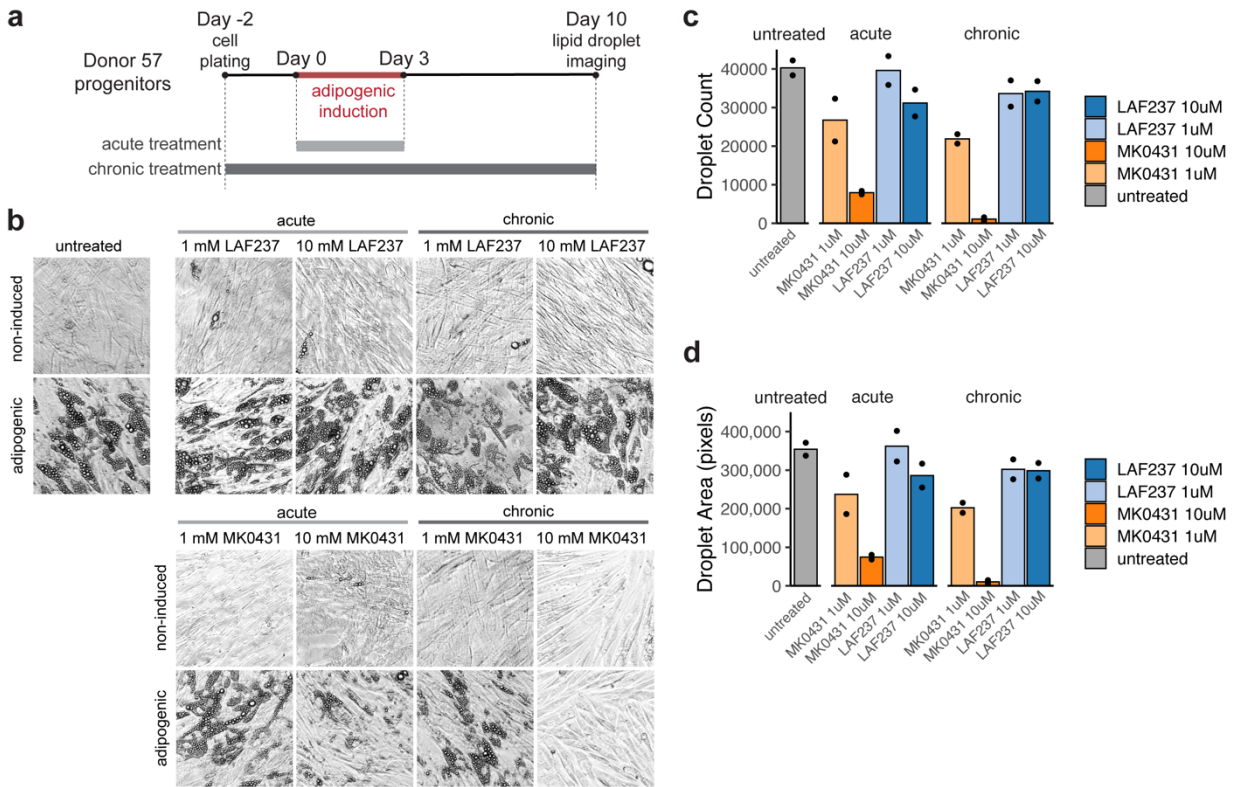

864 **Extended Data Fig. 4. *DPP4* inhibition does not promote adipogenesis.** **a.** Schematic of the  
 865 adipogenesis assay with acute or chronic *DPP4* inhibitor treatment, n=2. **b.** Images of 10-day  
 866 adipogenic induced cells with acute or chronic *DPP4* inhibitor treatment. **c,d.** Lipid droplet  
 867 quantification of 10-day adipogenic-induced cells with acute or chronic *DPP4* inhibitor treatment.  
 868

869

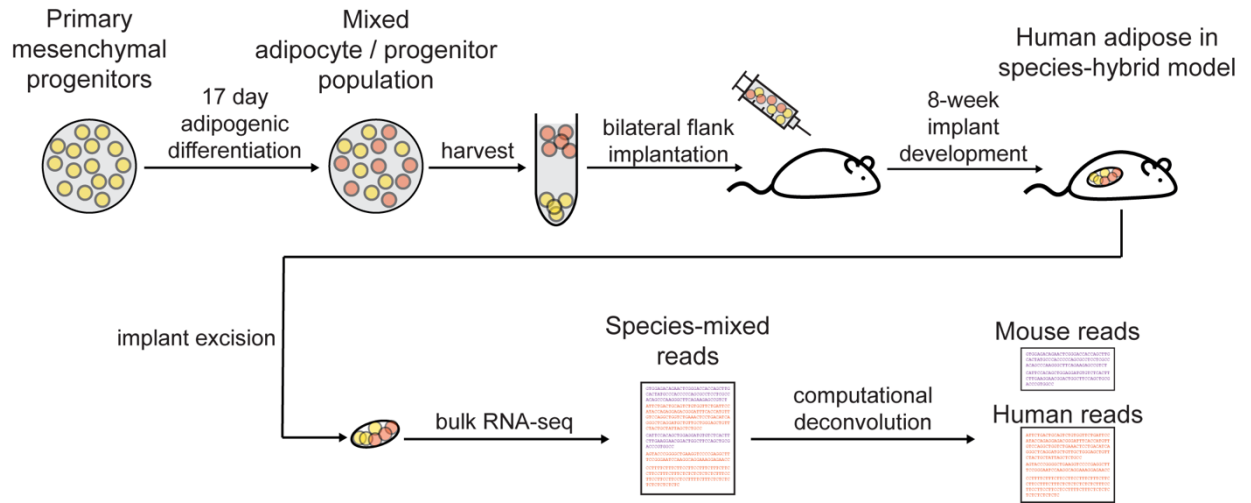

870

871 **Extended Data Fig. 5. Human adipogenic-induced progenitor mouse implantation model.**

872



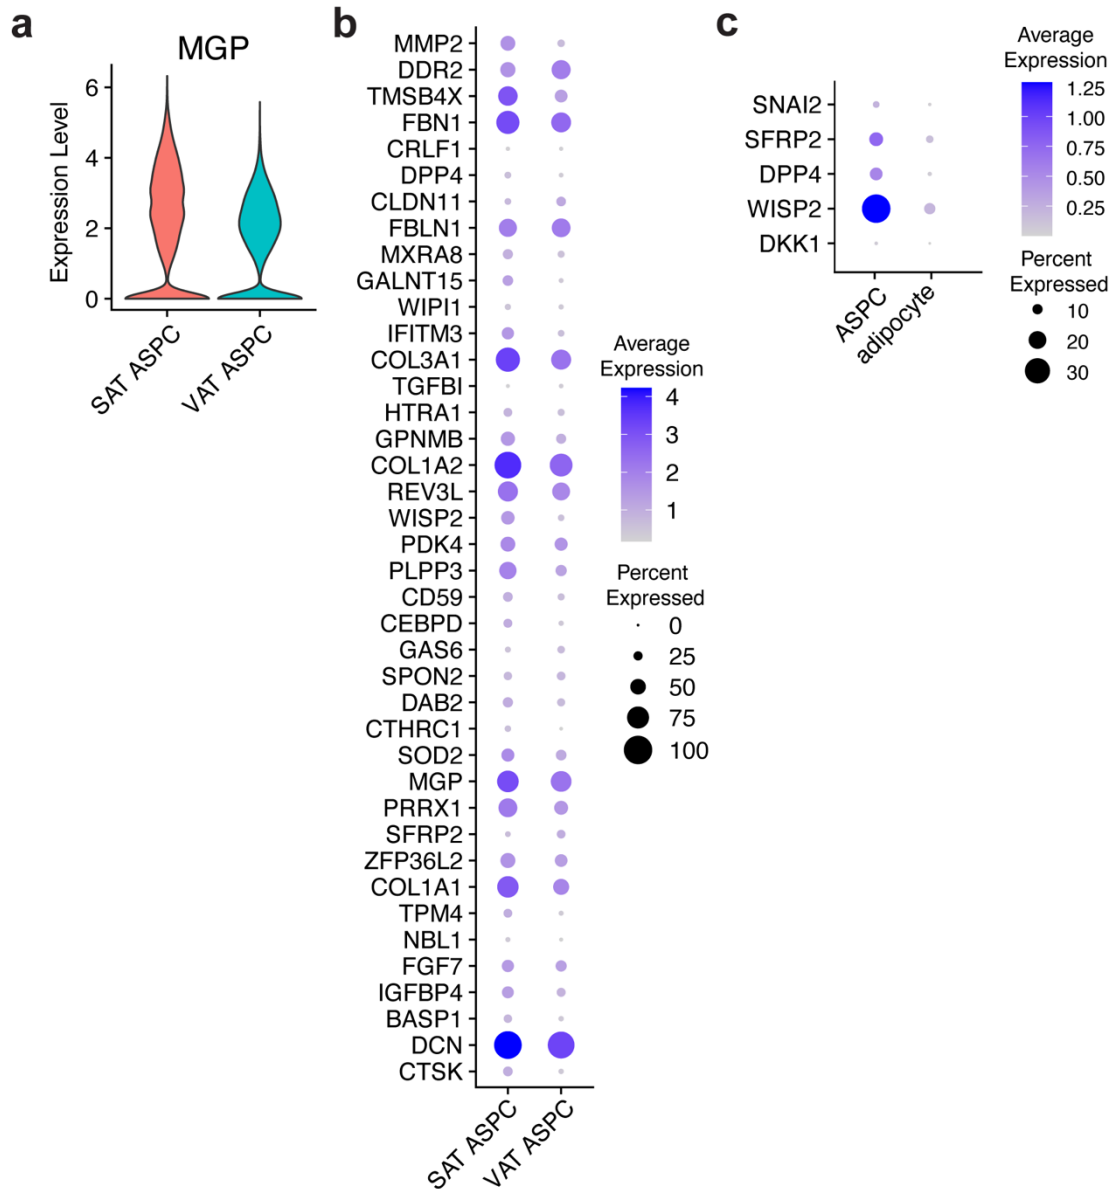

875 **Extended Data Fig. 6. *MGP*<sup>+</sup> cells resemble human adult APSCs and are enriched in**  
 876 **subcutaneous adipose tissue comparing to visceral adipose tissue. a.** Violin plot of *MGP*  
 877 expression visualized by adipose tissue depot from the Emont, et al. dataset. **b.** Dot plot of the  
 878 top 40 *MGP*<sup>+</sup> markers gene expression visualized by adipose tissue depot from the Emont, et al.  
 879 dataset. **c.** Canonical Wnt target genes identified in *MGP*<sup>+</sup> cells queried from the Emont, et al.  
 880 dataset.

881

882



883

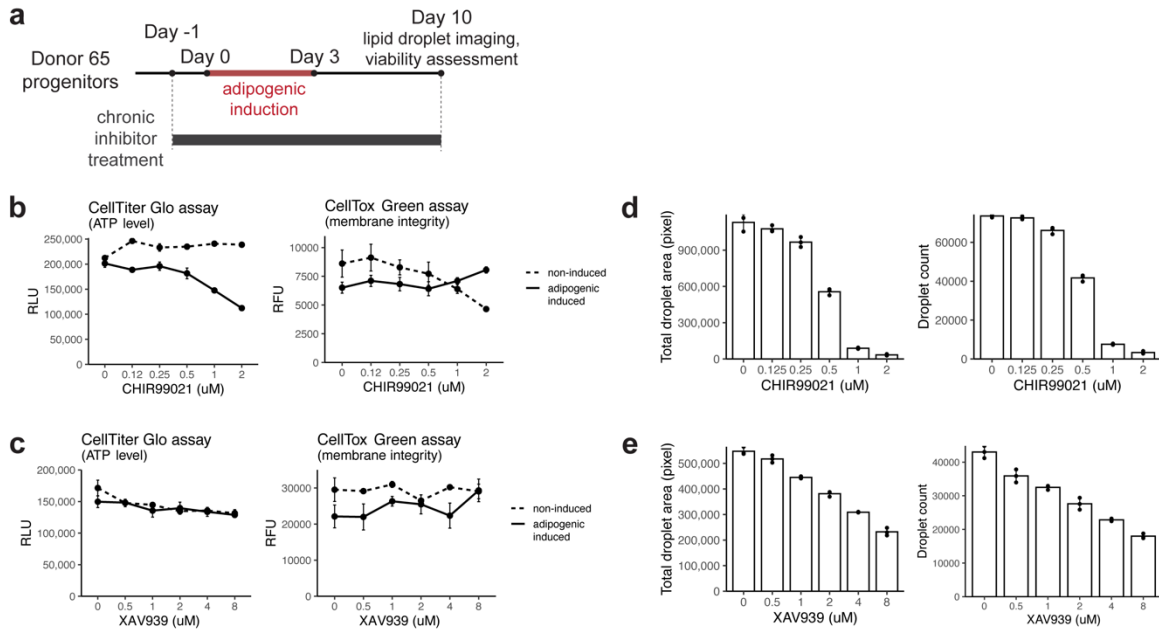

884

885 **Extend Data Fig. 7. Long term Wnt agonist/antagonist treatment suppresses adipogenesis.**

886 **a**, Schematic of the adipogenesis assay with chronic Wnt inhibition. **b**. Viability assessment of 10-

887 day adipogenic-induced cells under chronic exposure to different dosages of CHIR99021 (error

888 bars = SD,  $n = 3$ ). **c**. Viability assessment of 10-day adipogenic-induced cells under chronic

889 exposure to different dosages of XAV939 (error bars = SD,  $n = 3$ ). **d**. Lipid droplet quantification

890 of 10-day adipogenic-induced cells under chronic exposure to different dosages of CHIR99021

891 (error bars = SD,  $n = 3$ ). **e**. Lipid droplet quantification of 10-day adipogenic-induced cells under

892 chronic exposure to different dosages of XAV939 (error bars = SD,  $n = 3$ ).

893

894

895

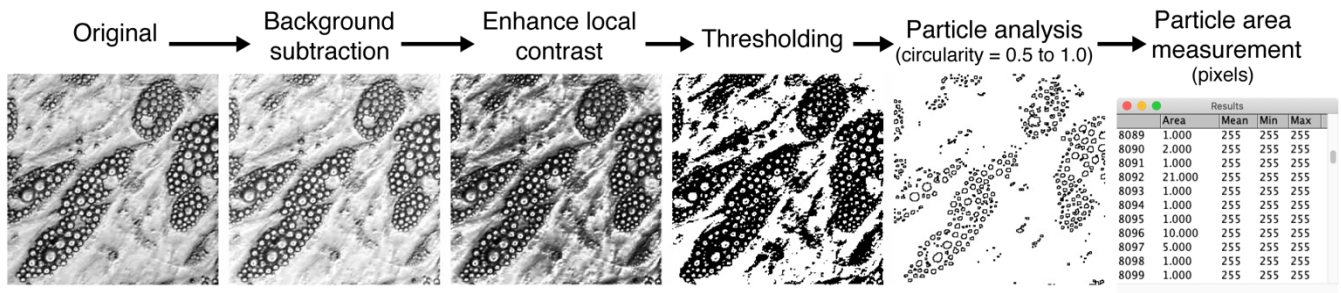

896

897 **Extended Data Fig. 8. Lipid droplet quantification permits statistical comparison of lipid**

898 **number and size. a.** Schematic of image processing process for lipid droplet quantification from

899 microscopy images.
